# Supplementary material for: Association of sleep duration and sleep quality with hypertension in oil workers in Xinjiang
Source: PeerJ journal article supplement (doi:10.7717/peerj.11318), 2021-05-03
Supplement: peerj-50421-PSQI.pdf [file peerj-50421-PSQI.pdf]

匹兹堡睡眠质量指数量表

| 条目 | 项目                                | 评分    |          |          |       |
|----|-----------------------------------|-------|----------|----------|-------|
|    |                                   | 0分    | 1分       | 2分       | 3分    |
| 1  | 近 1 个月，晚上上床睡觉通常在       点钟         |       |          |          |       |
| 2  | 近 1 个月，从上床到入睡通常需要         min     | 15min | 16~30min | 31~60min | 60min |
| 3  | 近 1 个月，通常早上       点起床             |       |          |          |       |
| 4  | 近 1 个月，每夜通常实际睡眠       h (不等于卧床时间) |       |          |          |       |
| 5  | 近 1 个月，因下列情况影响睡眠而烦恼               |       |          |          |       |
|    | a.入睡困难 ( 30min 内不能入睡)             | 无     | < 1 次/周  | 1~2 次/周  | 3 次/周 |
|    | b.夜间易醒或早醒                         | 无     | < 1 次/周  | 1~2 次/周  | 3 次/周 |
|    | c.夜间去厕所                           | 无     | < 1 次/周  | 1~2 次/周  | 3 次/周 |
|    | d.呼吸不畅                            | 无     | < 1 次/周  | 1~2 次/周  | 3 次/周 |
|    | e.咳嗽或鼾声高                          | 无     | < 1 次/周  | 1~2 次/周  | 3 次/周 |
|    | f.感觉冷                             | 无     | < 1 次/周  | 1~2 次/周  | 3 次/周 |
|    | g.感觉热                             | 无     | < 1 次/周  | 1~2 次/周  | 3 次/周 |
|    | h.做噩梦                             | 无     | < 1 次/周  | 1~2 次/周  | 3 次/周 |
|    | i.疼痛不适                            | 无     | < 1 次/周  | 1~2 次/周  | 3 次/周 |
|    | j.其它影响睡眠的事情<br>如有，请说明：            | 无     | < 1 次/周  | 1~2 次/周  | 3 次/周 |
| 6  | 近 1 个月，总的来说，您认为您的睡眠质量：            | 很好    | 较好       | 较差       | 很差    |
| 7  | 近 1 个月，您用药物催眠的情况：                 | 无     | < 1 次/周  | 1~2 次/周  | 3 次/周 |
| 8  | 近 1 个月，您常感到困倦吗？                   | 无     | < 1 次/周  | 1~2 次/周  | 3 次/周 |
| 9  | 近 1 个月您做事精力不足吗？                   | 没有    | 偶尔有      | 有时有      | 经常有   |

计分方法：

| 成分       | 内容                    | 评分    |                 |                |        |
|----------|-----------------------|-------|-----------------|----------------|--------|
|          |                       | 0分    | 1分              | 2分             | 3分     |
| A、睡眠质量   | 条目 6 计分               | 很好    | 较好              | 较差             | 很差     |
| B、入睡时间   | 条目 2和 5a 计分累计         | 0分    | 1~2分            | 3~4分           | 5~6分   |
| C、睡眠时间   | 条目 4 计分               | > 7h  | 6~7h (不含 6h)    | 5~6h (含 6h)    | < 5h   |
| D、睡眠效率   | 以条目 1、3、4 的应答计算睡眠效率 * | > 85% | 75~85% (不含 75%) | 65~75% (含 75%) | < 65%  |
| E、睡眠障碍   | 条目 5b~5j 计分累计         | 0分    | 1~9分            | 10~18分         | 19~27分 |
| F、催眠药物   | 条目 7 计分               | 无     | < 1次/周          | 1~2次/周         | 3次/周   |
| G、日间功能障碍 | 条目 8和 9 的计分累计         | 0分    | 1~2分            | 3~4分           | 5~6分   |

\*睡眠效率计算方法：

$$\text{睡眠效率} = \frac{\text{条目 4 (睡眠时间)}}{\text{条目 3 (起床时间) - 条目 1 (上床时间)}} \times 100\%$$
