# Supplementary material for: Association of sleep duration and sleep quality with hypertension in oil workers in Xinjiang
Source: PeerJ journal article supplement (doi:10.7717/peerj.11318), 2021-05-03
Supplement: PSQI_(English).pdf [file PSQI_%28English%29.pdf]

Pittsburgh Sleep Quality Index

| Entry | Item                                                                                                                                                    | Scoring                                            |                                                |                                               |                                                     |
|-------|---------------------------------------------------------------------------------------------------------------------------------------------------------|----------------------------------------------------|------------------------------------------------|-----------------------------------------------|-----------------------------------------------------|
|       |                                                                                                                                                         | 0                                                  | 1                                              | 2                                             | 3                                                   |
| 1     | During the past month, when have you usually gone to bed at night? _____                                                                                |                                                    |                                                |                                               |                                                     |
| 2     | During the past month, how long has it usually takes you to fall asleep each night?                                                                     | <input type="checkbox"/> ≤ 15 minutes              | <input type="checkbox"/> 16~30 minutes         | <input type="checkbox"/> 31~60 minutes        | <input type="checkbox"/> ≥ 60 minutes               |
| 3     | During the past month, when have you usually gotten up in the morning? _____                                                                            |                                                    |                                                |                                               |                                                     |
| 4     | During the past month, how many hours of actual sleep did you get at night? (This may be different than the number of hours you spend in bed.)<br>_____ |                                                    |                                                |                                               |                                                     |
| 5     | During the past month, you have been troubled by the following conditions that affect your sleep:                                                       |                                                    |                                                |                                               |                                                     |
|       | a. Difficulty in falling asleep (Cannot get to sleep within 30 minutes)                                                                                 | <input type="checkbox"/> Not during the past month | <input type="checkbox"/> Less than once a week | <input type="checkbox"/> Once or twice a week | <input type="checkbox"/> Three or more times a week |
|       | b. Wake up in the middle of the night or early morning                                                                                                  | <input type="checkbox"/> Not during the past month | <input type="checkbox"/> Less than once a week | <input type="checkbox"/> Once or twice a week | <input type="checkbox"/> Three or more times a week |
|       | c. Have to get up to use the bathroom                                                                                                                   | <input type="checkbox"/> Not during the past month | <input type="checkbox"/> Less than once a week | <input type="checkbox"/> Once or twice a week | <input type="checkbox"/> Three or more times a week |
|       | d. Cannot breathe comfortably                                                                                                                           | <input type="checkbox"/> Not during the past month | <input type="checkbox"/> Less than once a week | <input type="checkbox"/> Once or twice a week | <input type="checkbox"/> Three or more times a week |
|       | e. Cough or snore loudly                                                                                                                                | <input type="checkbox"/> Not during the past month | <input type="checkbox"/> Less than once a week | <input type="checkbox"/> Once or twice a week | <input type="checkbox"/> Three or more times a week |
|       | f. Feel too cold                                                                                                                                        | <input type="checkbox"/> Not during the past month | <input type="checkbox"/> Less than once a week | <input type="checkbox"/> Once or twice a week | <input type="checkbox"/> Three or more times a week |
|       | g. Feel too hot                                                                                                                                         | <input type="checkbox"/> Not during the past month | <input type="checkbox"/> Less than once a week | <input type="checkbox"/> Once or twice a week | <input type="checkbox"/> Three or more times a week |
|       | h. Had bad dreams                                                                                                                                       | <input type="checkbox"/> Not during the past month | <input type="checkbox"/> Less than once a week | <input type="checkbox"/> Once or twice a week | <input type="checkbox"/> Three or more times a week |

|   |                                                                                                                                  |  |                                                    |                                                     |                                                |                                                     |
|---|----------------------------------------------------------------------------------------------------------------------------------|--|----------------------------------------------------|-----------------------------------------------------|------------------------------------------------|-----------------------------------------------------|
|   |                                                                                                                                  |  | past month                                         | a week                                              | twice a week                                   | times a week                                        |
|   | i. Have pain                                                                                                                     |  | <input type="checkbox"/> Not during the past month | <input type="checkbox"/> Less than once a week      | <input type="checkbox"/> Once or twice a week  | <input type="checkbox"/> Three or more times a week |
|   | j. Other reasons, please describe: How often during the past month have you had trouble sleeping because of this?                |  | <input type="checkbox"/> Not during the past month | <input type="checkbox"/> Less than once a week      | <input type="checkbox"/> Once or twice a week  | <input type="checkbox"/> Three or more times a week |
| 6 | During the past month, how would you rate your sleep quality overall?                                                            |  | <input type="checkbox"/> Very good                 | <input type="checkbox"/> Fairly good                | <input type="checkbox"/> Fairly bad            | <input type="checkbox"/> Very bad                   |
| 7 | During the past month, how often have you taken medicine to help you sleep?                                                      |  | <input type="checkbox"/> Not during the past month | <input type="checkbox"/> Less than once a week      | <input type="checkbox"/> Once or twice a week  | <input type="checkbox"/> Three or more times a week |
| 8 | During the past month, how often have you had trouble staying awake while driving, eating meals, or engaging in social activity? |  | <input type="checkbox"/> Not during the past month | <input type="checkbox"/> Less than once a week      | <input type="checkbox"/> Once or twice a week  | <input type="checkbox"/> Three or more times a week |
| 9 | During the past month, how much of a problem has it been for you to keep up enough enthusiasm to get things done?                |  | <input type="checkbox"/> No problem at all         | <input type="checkbox"/> Only a very slight problem | <input type="checkbox"/> Somewhat of a problem | <input type="checkbox"/> A very big problem         |

Scoring method:

| Entry               | Content                    | Scoring                                            |                                                 |                                                 |                                                     |
|---------------------|----------------------------|----------------------------------------------------|-------------------------------------------------|-------------------------------------------------|-----------------------------------------------------|
|                     |                            | 0                                                  | 1                                               | 2                                               | 3                                                   |
| Sleep quality       | 6                          | <input type="checkbox"/> Very good                 | <input type="checkbox"/> Fairly good            | <input type="checkbox"/> Fairly bad             | <input type="checkbox"/> Very bad                   |
| Sleep latency       | 2+5a                       | <input type="checkbox"/> 0                         | <input type="checkbox"/> 1~2                    | <input type="checkbox"/> 3~4                    | <input type="checkbox"/> 5~6                        |
| Sleep duration      | 4                          | <input type="checkbox"/> >7h                       | <input type="checkbox"/> 6~7h (excluding 6h)    | <input type="checkbox"/> 5~6 (including 6h)     | <input type="checkbox"/> <5h                        |
| Sleep efficiency    | 1, 3, 4                    | <input type="checkbox"/> >85%                      | <input type="checkbox"/> 75~85% (excluding 75%) | <input type="checkbox"/> 65~75% (including 75%) | <input type="checkbox"/> <65%                       |
| Sleep disturbance   | 5b+5c+5d+5e+5f+5g+5h+5i+5j | <input type="checkbox"/> 0                         | <input type="checkbox"/> 1~9                    | <input type="checkbox"/> 10~18                  | <input type="checkbox"/> 19~27                      |
| Sleeping medication | 7                          | <input type="checkbox"/> Not during the past month | <input type="checkbox"/> Less than once a week  | <input type="checkbox"/> Once or twice a week   | <input type="checkbox"/> Three or more times a week |
| Daytime dysfunction | 8+9                        | <input type="checkbox"/> 0                         | <input type="checkbox"/> 1~2                    | <input type="checkbox"/> 3~4                    | <input type="checkbox"/> 5~6                        |

\* Sleep efficiency is calculated by

$$\text{Sleep efficiency} = \frac{4(\text{sleep disturbance})}{3(\text{wake up time}) - 1(\text{bedtime})} \times 100\%$$
