# Supplementary material for: Association of sleep duration and sleep quality with hypertension in oil workers in Xinjiang
Source: PeerJ. 2021 May 3;9:e11318. doi: 10.7717/peerj.11318 (PMC8101473; doi:10.7717/peerj.11318)
Supplement: Supplemental Information 1 [file peerj-09-11318-s001.xls]

## Sheet: Sheet1
Age	Gender	Sleep quality	Sleep duration	Ethnicity	Education level	Job title	Marriage	Length of service	Body mass index	BMI	smoking	Drinking alcohol	Income	Shift work	Hypertension
1	1	2	2	1	2	3	1	1	20.06	1	1	2	1	1	1
1	1	2	2	1	2	3	1	1	20.06	1	1	2	1	1	1
1	1	2	2	2	1	2	2	1	18.82	1	1	1	2	1	1
1	1	2	1	2	2	1	2	1	20.31	1	1	1	1	1	1
1	1	2	2	1	2	2	2	1	22.32	1	1	1	1	1	1
1	1	2	2	1	2	3	2	1	17.97	2	1	1	1	1	1
1	1	2	2	1	2	2	2	1	18.82	1	1	2	1	1	1
1	1	2	2	1	2	3	1	1	18.56	1	1	2	1	1	1
1	1	2	1	2	2	2	1	1	18.36	2	1	1	2	1	1
1	1	2	2	1	2	3	1	1	20.2	1	1	2	2	1	1
1	1	2	2	1	2	2	2	1	22.32	1	1	1	1	1	1
1	1	2	2	1	2	2	1	1	18.75	1	1	1	2	1	1
1	1	2	1	1	2	2	3	1	15.59	2	1	1	1	1	1
1	1	2	1	1	2	2	1	1	18.14	2	1	2	2	1	1
1	1	2	1	2	2	3	1	1	19.14	1	1	1	1	1	1
1	1	1	1	1	2	2	1	1	19.23	1	1	1	1	1	1
1	1	1	1	1	2	2	2	1	21.05	1	1	1	2	1	1
1	1	1	1	1	2	3	1	1	18.37	2	1	1	2	1	1
1	1	2	1	2	2	1	1	1	19.83	1	1	1	1	1	1
1	1	2	1	1	2	3	1	1	20.03	1	1	1	2	1	1
1	1	2	1	1	2	3	1	1	18.43	2	1	1	2	1	1
1	1	2	1	1	2	3	1	1	17.15	2	1	1	2	1	1
1	1	2	1	1	2	2	1	1	22.58	1	1	1	1	1	1
1	1	2	1	1	2	3	2	1	21.8	1	1	1	1	1	1
1	1	2	1	1	2	3	2	1	20.76	1	1	1	1	1	1
1	1	2	1	1	2	1	1	1	19.6	1	1	2	2	1	1
1	1	1	1	2	2	2	2	1	21.26	1	1	2	1	1	1
1	1	1	1	1	2	3	1	1	25.47	3	1	1	1	1	1
1	1	2	1	1	2	1	2	1	25	1	1	2	2	1	1
1	1	2	1	1	2	2	2	1	28.52	3	1	1	1	1	1
1	1	2	1	1	2	2	2	1	19.96	1	1	1	1	1	1
1	1	2	1	1	2	3	1	1	20.03	1	1	1	1	1	1
1	1	2	1	1	2	2	3	1	15.59	2	1	1	1	1	1
1	1	2	1	1	2	2	2	1	17.92	2	1	2	2	1	1
1	1	1	1	1	2	2	2	1	22.96	1	2	2	2	1	1
1	1	2	1	1	2	3	2	1	20.31	1	1	1	1	1	1
1	1	1	1	1	2	2	2	1	17.85	2	1	2	1	1	1
1	1	2	1	1	2	3	1	1	22.06	1	1	1	2	1	1
1	1	2	1	1	2	3	1	1	27.64	3	2	1	2	1	1
1	1	2	2	1	2	3	2	1	22.04	1	1	1	1	1	1
1	1	2	1	2	2	2	2	1	24.03	1	1	1	1	1	1
1	1	2	1	2	2	2	2	1	23.51	1	1	1	1	1	1
1	1	1	2	1	2	2	2	1	22.96	1	2	2	2	1	1
1	1	2	2	1	2	2	2	1	18.82	1	1	2	1	1	1
1	1	2	2	2	2	3	2	1	23.44	1	1	1	2	1	1
1	1	1	2	1	2	2	2	1	21.05	1	1	1	2	1	1
1	1	2	2	1	2	1	2	1	23.88	1	1	1	2	1	1
1	1	2	1	1	2	2	1	1	20.96	1	1	1	2	1	1
1	1	1	1	2	2	3	2	1	26.95	3	1	1	1	1	1
1	1	2	1	2	2	3	1	1	16.9	2	1	1	2	1	1
1	1	2	1	2	2	2	2	1	21.26	1	1	2	1	1	1
1	1	1	1	1	2	2	2	1	17.85	2	1	2	1	1	1
1	1	2	1	1	2	1	2	1	20.94	1	1	2	1	1	1
1	1	2	1	1	2	2	1	1	18.14	2	1	2	2	1	1
1	1	1	1	1	2	3	2	1	19.27	1	1	1	2	1	1
1	1	2	1	2	2	3	2	1	23.11	1	1	1	1	1	1
1	1	2	1	1	2	3	1	1	20.03	1	1	1	2	1	1
1	1	2	1	1	2	3	1	1	19.2	1	1	2	1	1	1
1	1	2	1	1	2	3	2	1	18.47	2	1	1	2	1	1
1	1	2	1	1	2	3	2	1	20.76	1	1	1	1	1	1
1	1	2	1	1	2	2	3	1	29.64	3	1	1	2	1	1
1	1	2	1	1	2	3	2	1	20.55	1	2	2	1	1	1
1	1	2	1	2	2	3	2	1	23.11	1	1	1	1	1	1
1	1	2	1	1	2	2	2	1	19.96	1	1	1	1	1	1
1	1	1	1	1	2	3	2	1	19.72	1	1	1	2	1	1
1	1	1	1	1	2	1	3	1	18.73	1	1	2	2	1	1
1	1	1	1	1	2	1	1	1	19.6	1	1	2	2	1	1
1	1	2	1	2	2	2	1	1	27.89	3	1	1	1	1	1
1	1	1	1	1	2	3	2	1	19.27	1	1	1	2	1	1
1	1	2	1	1	2	3	1	1	21.83	1	1	1	1	1	1
1	1	1	1	1	2	3	2	1	17.26	2	1	1	1	1	1
1	1	1	1	1	2	3	1	1	25.47	3	1	1	1	1	1
1	1	2	1	2	2	2	1	1	20.24	1	1	1	1	1	1
1	1	2	2	1	2	3	1	1	18.56	1	1	2	1	1	1
1	1	2	2	1	2	3	2	1	17.97	2	1	1	1	1	1
1	1	2	1	2	2	2	2	1	19.05	1	1	1	2	1	1
1	1	1	2	2	2	1	2	1	30.45	3	1	1	1	1	1
1	1	2	3	2	2	2	3	1	27.7	3	1	1	2	1	1
1	1	2	1	1	2	2	1	1	20.69	1	1	2	1	1	1
1	1	1	1	2	2	2	2	1	23.51	1	1	1	1	1	1
1	1	2	1	1	1	1	2	1	21.34	1	1	2	2	1	1
1	1	2	1	1	2	1	2	1	17.47	2	1	2	1	1	1
1	1	2	1	2	2	2	1	1	18.36	2	1	1	2	1	1
1	1	2	1	1	2	3	1	1	16.61	2	1	2	1	1	1
1	1	2	1	1	2	1	2	1	25	1	1	2	2	1	1
1	1	2	2	1	2	3	1	1	18.43	2	1	1	2	1	1
1	1	2	2	2	2	1	1	1	23.39	1	1	1	1	1	1
1	1	2	1	1	2	3	2	1	20.31	1	1	1	1	1	1
1	1	1	1	1	2	1	3	1	18.73	1	1	2	2	1	1
1	1	2	1	1	2	1	2	1	20.94	1	1	2	1	1	1
1	2	2	1	1	2	2	1	1	26.3	3	2	1	1	1	1
1	2	2	1	1	2	1	1	1	20.29	1	2	2	1	1	1
1	2	1	1	1	2	2	2	1	26.22	3	2	2	1	1	1
1	2	2	1	1	1	2	2	1	26.2	3	1	2	2	1	1
1	2	2	1	2	1	2	1	1	26.87	3	1	1	1	1	1
1	2	2	2	1	2	3	3	1	23.15	1	2	2	1	1	1
1	2	2	1	2	1	3	2	1	22.53	1	2	1	2	1	1
1	2	2	1	1	2	2	2	1	24.42	1	2	2	2	1	1
1	2	2	1	1	2	2	2	1	24.22	1	1	1	2	1	1
1	2	2	1	1	2	3	2	1	23.45	1	2	2	1	1	1
1	2	1	1	1	2	3	2	1	23.62	1	1	2	2	1	1
1	2	1	3	2	1	3	1	1	22.86	1	1	1	1	1	1
1	2	2	2	1	1	3	1	1	22.09	1	2	2	2	1	1
1	2	2	2	1	2	1	1	1	26.57	3	1	2	1	1	1
1	2	2	2	2	2	3	1	1	22.86	1	2	2	2	1	1
1	2	2	2	1	2	3	1	1	23.55	1	2	2	1	1	1
1	2	2	2	2	2	2	1	1	27.7	3	2	2	1	1	1
1	2	2	1	1	2	3	1	1	25.06	3	2	2	2	1	1
1	2	2	2	2	2	3	2	1	28.41	3	2	2	2	1	1
1	2	1	3	2	1	3	1	1	22.86	1	1	1	1	1	1
1	2	2	1	1	2	3	1	1	26.87	3	2	2	1	1	1
1	2	2	1	1	1	3	1	1	23.03	1	2	2	2	1	1
1	2	1	3	1	2	3	1	1	19.57	1	2	2	1	1	1
1	2	2	2	1	2	3	1	1	22.28	1	2	2	1	1	1
1	2	2	1	1	2	2	1	1	26.3	3	2	2	2	1	1
1	2	2	2	1	2	2	2	1	26.58	3	2	1	1	1	1
1	2	2	2	2	2	3	2	1	29.04	3	2	2	2	1	1
1	2	2	2	2	2	3	2	1	29.04	3	2	2	2	1	1
1	2	2	1	1	2	2	2	1	23.53	1	2	2	2	1	1
1	2	2	2	1	2	3	2	1	24.62	1	1	1	2	1	1
1	2	2	1	1	2	3	2	1	22.2	1	2	2	1	1	1
1	2	2	1	1	1	3	2	1	25.71	3	2	2	2	1	1
1	2	2	1	1	1	3	1	1	24.22	1	1	2	1	1	1
1	2	2	1	1	1	3	2	1	21.26	1	2	2	2	1	1
1	2	2	1	1	2	3	2	1	21.91	1	1	1	1	1	1
1	2	2	1	1	2	1	1	1	26.57	3	1	2	1	1	1
1	2	2	1	2	2	1	2	1	25.06	3	2	2	2	1	1
1	2	2	1	1	2	3	1	1	30.32	3	2	1	2	1	1
1	2	1	1	1	2	3	1	1	21.72	1	2	2	1	1	1
1	2	2	1	1	2	3	2	1	25.95	3	1	2	1	1	1
1	2	1	1	1	2	3	1	1	21.47	1	2	1	1	1	1
1	2	2	1	1	2	2	2	1	26.2	3	2	2	1	1	1
1	2	2	1	1	2	3	2	1	25.95	3	1	2	1	1	1
1	2	2	1	2	1	3	1	1	27.04	3	1	2	2	1	1
1	2	2	1	2	2	3	1	1	18.52	1	2	2	1	1	1
1	2	2	1	1	2	2	1	1	28.69	3	1	2	1	1	1
1	2	1	1	1	1	3	1	1	20.75	1	2	1	2	1	1
1	2	2	1	1	2	1	1	1	20.76	1	1	2	1	1	1
1	2	1	1	1	1	3	1	1	22.23	1	1	2	2	1	1
1	2	1	1	1	1	2	3	1	21.97	1	1	2	2	1	1
1	2	2	1	1	2	2	1	1	22.34	1	1	2	1	1	1
1	2	2	1	2	1	3	1	1	27.04	3	1	2	2	1	1
1	2	1	1	1	2	2	2	1	28.41	3	2	2	2	1	1
1	2	1	1	1	2	3	1	1	26.87	3	2	2	1	1	1
1	2	2	1	1	2	2	1	1	21.05	1	2	2	2	1	1
1	2	2	1	1	2	3	2	1	24.62	1	1	2	1	1	1
1	2	2	1	2	2	3	2	1	19.25	1	1	1	1	1	1
1	2	2	1	1	2	2	2	1	25.95	3	1	2	2	1	1
1	2	1	1	1	2	2	1	1	23.89	1	2	2	2	1	1
1	2	1	1	1	2	2	1	1	23.26	1	2	2	2	1	1
1	2	2	1	2	2	2	2	1	27.17	3	2	2	2	1	1
1	2	2	1	1	2	2	2	1	25.06	3	1	2	1	1	1
1	2	2	1	1	2	2	1	1	27.76	3	1	2	1	1	1
1	2	2	1	1	2	2	2	1	30.52	3	2	1	2	1	1
1	2	2	1	2	2	3	2	1	19.25	1	1	1	1	1	1
1	2	2	1	1	2	1	1	1	25.88	3	2	2	2	1	1
1	2	2	1	1	2	3	1	1	23.03	1	1	2	2	1	1
1	2	2	1	1	2	3	1	1	18.5	2	2	2	2	1	1
1	2	2	1	2	2	2	2	1	25.56	3	1	1	2	1	1
1	2	1	1	1	1	3	1	1	25.46	3	2	2	1	1	1
1	2	1	1	1	1	3	2	1	26.81	3	2	2	1	1	1
1	2	2	1	1	2	2	1	1	22.15	1	2	2	1	1	1
1	2	1	1	1	2	3	2	1	22.4	1	2	2	1	1	1
1	2	1	1	1	2	2	1	1	22.32	1	1	2	2	1	1
1	2	1	1	2	2	3	3	1	24.05	1	2	2	2	1	1
1	2	2	1	1	2	3	1	1	23.55	1	2	2	1	1	1
1	2	1	1	2	2	3	2	1	29.01	3	2	1	1	1	1
1	2	1	1	1	1	3	2	1	19.59	1	2	2	2	1	1
1	2	2	2	1	2	3	1	1	28.63	3	2	2	1	1	1
1	2	1	1	1	2	1	2	1	24.69	1	1	2	1	1	1
1	2	2	1	2	2	2	2	1	32.08	3	2	2	2	1	1
1	2	2	1	1	2	1	2	1	24.42	1	1	2	2	1	1
1	2	1	1	1	2	3	1	1	28.4	3	1	2	2	1	1
1	2	2	1	1	2	2	2	1	26.3	3	2	2	1	1	1
1	2	1	1	2	2	2	2	1	29.07	3	2	2	2	1	1
1	2	2	1	1	2	2	2	1	24.97	1	1	2	2	1	1
1	2	2	1	1	2	3	2	1	22.2	1	2	2	1	1	1
1	2	2	2	2	2	2	1	1	27.7	3	2	2	1	1	1
1	2	2	1	1	1	3	1	1	24.22	1	1	2	1	1	1
1	2	2	1	2	2	3	1	1	22.04	1	2	2	1	1	1
1	2	2	2	1	1	3	2	1	19.82	1	2	2	2	1	1
1	2	2	1	2	1	3	2	1	24.22	1	1	1	2	1	1
1	2	1	1	1	2	2	1	1	22.32	1	1	2	2	1	1
1	2	2	1	1	2	2	2	1	25.62	3	1	2	1	1	1
1	2	2	1	1	2	1	1	1	25.88	3	2	2	2	1	1
1	2	2	1	1	1	3	1	1	19.27	1	1	1	2	1	1
1	2	2	1	2	2	3	1	1	28.86	3	2	2	2	1	1
1	2	2	1	1	2	1	1	1	20.76	1	1	2	1	1	1
1	2	2	1	1	2	3	2	1	23.36	1	2	2	2	1	1
2	1	2	1	1	2	1	2	1	22.77	1	1	1	2	1	1
2	1	2	1	1	2	2	2	1	22.86	1	1	1	1	1	1
2	1	2	2	2	2	1	3	1	20.7	1	1	1	2	1	1
2	1	2	2	2	2	1	2	1	25.69	3	1	2	1	1	1
2	1	2	2	1	2	1	2	1	24.01	1	2	2	2	1	1
2	1	2	2	1	2	1	2	1	22.86	1	1	1	1	1	1
2	1	1	2	2	1	2	2	1	23.12	1	1	1	1	1	1
2	1	1	2	2	2	1	2	1	24.09	1	1	1	2	1	1
2	1	2	1	1	2	1	2	1	24.97	1	1	1	1	1	1
2	1	2	1	2	2	1	2	1	25.65	3	1	1	2	1	1
2	1	2	2	2	1	2	2	1	23.12	1	1	1	1	1	1
2	1	2	2	2	2	1	3	1	20.7	1	1	1	2	1	1
2	1	2	2	2	2	3	2	1	24.01	1	1	2	2	1	1
2	1	2	2	1	2	1	2	1	22.86	1	1	1	1	1	1
2	1	2	2	2	1	2	2	1	18.82	1	1	1	2	1	1
2	1	2	1	2	2	1	2	1	37.11	3	1	1	2	1	1
2	1	1	2	2	2	2	2	1	20.07	1	1	1	2	1	1
2	1	2	1	2	2	1	2	1	21.56	1	1	2	2	1	1
2	1	2	1	1	2	2	2	1	20.7	1	1	2	2	1	1
2	1	2	1	1	2	2	2	1	22.27	1	1	2	1	1	1
2	1	2	1	1	2	2	2	1	21.48	1	1	1	1	1	1
2	1	2	1	1	2	1	1	1	22.86	1	1	1	1	1	1
2	1	2	1	2	2	1	2	1	18.75	1	1	1	1	1	1
2	1	2	1	2	2	1	2	1	25.65	3	1	1	2	1	1
2	1	2	1	1	2	3	2	1	28.23	3	1	1	2	1	1
2	1	2	1	1	2	2	2	1	21.48	1	1	1	1	1	1
2	1	2	1	1	2	1	2	1	24.97	1	1	1	1	1	1
2	1	2	1	1	2	1	2	1	20.03	1	1	2	1	1	1
2	1	2	1	1	2	2	2	1	22.27	1	1	2	1	1	1
2	1	1	1	1	2	2	2	1	23.62	1	1	1	1	1	1
2	1	2	1	1	2	3	2	1	20.69	1	1	1	2	1	1
2	1	2	1	2	2	1	2	1	22.83	1	1	1	1	1	1
2	1	2	1	1	2	1	2	1	23.53	1	1	1	1	1	1
2	1	2	1	1	2	3	2	1	18.75	1	1	1	2	1	1
2	1	2	1	1	2	1	1	1	22.86	1	1	1	1	1	1
2	1	2	1	1	2	3	2	1	20.58	1	1	1	2	1	1
2	1	2	1	1	2	3	2	1	28.23	3	1	1	2	1	1
2	1	2	1	2	2	2	2	1	18.14	2	1	1	2	1	1
2	1	2	1	1	2	2	2	1	20.7	1	1	2	2	1	1
2	1	2	2	1	2	1	2	1	26.99	3	1	2	2	1	1
2	1	2	1	1	2	3	2	1	20.17	1	1	1	1	1	1
2	1	2	3	2	2	2	3	1	27.7	3	1	1	2	1	1
2	1	2	2	2	2	2	2	1	20.28	1	1	1	2	1	1
2	1	2	2	2	2	1	2	1	18.78	1	1	1	1	1	1
2	1	1	1	1	2	1	2	1	23.15	1	1	1	1	1	1
2	1	2	2	2	2	3	1	1	18.08	2	1	1	2	1	1
2	1	2	2	2	2	2	2	1	21.97	1	1	1	1	1	1
2	1	2	1	2	2	2	2	1	20.94	1	1	1	2	1	1
2	1	2	2	2	2	2	2	1	23.71	1	1	1	1	1	1
2	1	2	2	1	2	1	2	1	24.46	1	1	2	2	1	1
2	1	2	1	1	2	2	2	1	23.95	1	1	2	2	1	1
2	1	1	1	1	2	3	2	1	20.9	1	1	1	2	1	1
2	1	2	1	1	1	1	2	1	21.34	1	1	2	2	1	1
2	1	2	1	2	2	2	1	1	22.23	1	1	1	2	1	1
2	1	1	1	2	2	3	2	1	24.51	1	1	1	1	1	1
2	1	2	1	1	2	3	2	1	27.85	3	1	2	2	1	1
2	1	2	1	2	2	3	2	1	19.95	1	1	2	1	1	1
2	1	2	1	2	2	3	2	1	19.95	1	1	2	1	1	1
2	1	1	1	1	2	1	1	1	26.37	3	1	1	2	1	1
2	1	1	1	1	2	1	2	1	23.15	1	1	1	1	1	1
2	1	2	1	2	2	1	2	1	26.45	3	2	1	2	1	1
2	1	2	1	1	2	2	2	1	19.71	1	1	1	2	1	1
2	1	2	1	1	2	1	2	1	26.99	3	1	2	2	1	1
2	1	2	1	2	2	2	2	1	26.42	3	1	1	1	1	1
2	1	2	1	1	2	2	2	1	17.01	2	1	1	2	1	1
2	1	2	1	2	2	2	1	1	27.34	3	1	1	2	1	1
2	1	2	1	1	2	3	2	1	21.77	1	1	1	2	1	1
2	1	2	1	1	2	3	2	1	27.85	3	1	2	2	1	1
2	1	2	1	2	2	1	2	1	24.22	1	1	1	1	1	1
2	1	2	1	2	2	3	1	1	21.77	1	1	1	1	1	1
2	1	2	1	2	2	1	2	1	19.84	1	1	1	2	1	1
2	1	2	1	2	2	1	2	1	26.81	3	1	1	2	1	1
2	1	2	1	1	2	2	2	1	17.01	2	1	1	2	1	1
2	1	2	1	1	2	3	2	1	23.24	1	1	1	1	1	1
2	1	1	1	1	2	2	2	1	22.1	1	1	1	1	1	1
2	1	2	1	1	2	2	2	1	21.48	1	1	1	2	1	1
2	1	2	1	1	2	3	1	1	22.19	1	1	1	1	1	1
2	1	2	1	2	2	2	2	1	16.41	2	1	1	1	1	1
2	1	2	1	1	2	3	2	1	21.77	1	1	1	2	1	1
2	1	2	1	2	2	3	1	1	21.77	1	1	1	1	1	1
2	1	2	1	1	2	2	2	1	16.8	2	1	2	2	1	1
2	1	2	1	2	2	3	2	1	30.48	3	1	1	1	1	1
2	1	2	1	2	2	2	3	1	18.87	1	1	1	1	1	1
2	1	2	1	2	2	1	2	1	26.45	3	2	1	2	1	1
2	2	1	1	1	2	2	2	1	24.91	1	1	1	1	1	1
2	2	1	1	1	2	1	2	1	19.13	1	2	2	1	1	1
2	2	2	2	1	2	2	2	1	22.04	1	1	1	1	1	1
2	2	2	2	2	2	2	2	1	23.45	1	2	2	2	1	1
2	2	1	2	1	2	3	2	1	22.34	1	2	2	1	1	1
2	2	2	3	1	2	1	2	1	23.12	1	2	1	2	1	1
2	2	2	2	1	2	2	1	1	28.41	3	2	1	2	1	1
2	2	1	1	2	2	3	2	1	28.41	3	1	1	2	1	1
2	2	2	2	2	2	3	2	1	27.68	3	2	2	2	1	1
2	2	2	2	2	1	2	2	1	28.41	3	1	1	2	1	1
2	2	2	2	1	1	3	2	1	23.96	1	2	2	2	1	1
2	2	2	2	2	2	1	2	1	21.63	1	2	2	2	1	1
2	2	1	1	1	2	1	2	1	25.95	3	2	2	2	1	1
2	2	2	3	2	1	3	2	1	25.38	3	2	2	1	1	1
2	2	2	2	1	1	3	2	1	23.96	1	2	2	2	1	1
2	2	1	1	2	1	2	3	1	29.03	3	2	2	2	1	1
2	2	2	2	2	2	1	2	1	21.63	1	2	2	2	1	1
2	2	2	2	2	2	2	2	1	23.45	1	2	2	2	1	1
2	2	2	2	2	2	3	2	1	24.11	1	2	2	2	1	1
2	2	2	2	1	2	2	2	1	20.2	1	1	2	2	1	1
2	2	2	2	1	2	1	1	1	23.99	1	1	1	2	1	1
2	2	2	1	1	2	2	2	1	28.4	3	1	2	1	1	1
2	2	1	1	1	2	1	2	1	19.13	1	2	2	1	1	1
2	2	2	1	2	2	1	2	1	31.02	3	2	2	1	1	1
2	2	2	1	1	2	3	2	1	29.03	3	2	2	2	1	1
2	2	1	1	1	2	1	2	1	22.34	1	1	2	1	1	1
2	2	2	1	2	2	2	2	1	29.3	3	2	2	2	1	1
2	2	2	1	1	2	3	2	1	27.92	3	1	2	1	1	2
2	2	1	1	1	2	2	2	1	25.26	3	2	2	1	1	1
2	2	1	1	2	2	1	2	1	21.78	1	2	2	1	1	1
2	2	2	1	1	2	1	2	1	30.47	3	1	2	2	1	1
2	2	1	1	2	2	2	2	1	25.06	3	2	1	1	1	1
2	2	1	1	2	2	3	2	1	29.32	3	2	2	2	1	1
2	2	1	1	2	2	3	2	1	28.41	3	1	1	2	1	1
2	2	2	1	1	2	2	2	1	19.82	1	1	1	1	1	1
2	2	2	1	1	2	2	2	1	21.3	1	2	2	1	1	1
2	2	2	1	2	2	1	2	1	23.77	1	2	2	2	1	1
2	2	2	1	1	2	3	1	1	22.53	1	2	2	2	1	1
2	2	1	1	2	2	2	2	1	23.34	1	2	2	1	1	1
2	2	2	1	1	2	2	2	1	25.31	3	2	2	2	1	1
2	2	1	1	1	2	2	2	1	22.09	1	2	2	1	1	1
2	2	1	1	1	2	1	2	1	25.95	3	2	2	2	1	1
2	2	2	1	1	2	1	2	1	25.43	3	1	2	2	1	1
2	2	2	1	1	2	1	2	1	26.23	3	1	2	1	1	1
2	2	1	1	2	1	2	3	1	29.03	3	2	2	2	1	1
2	2	1	1	2	2	1	2	1	21.78	1	2	2	1	1	1
2	2	1	1	2	2	1	2	1	25.26	3	2	2	2	1	1
2	2	2	1	1	2	3	2	1	31.56	3	1	2	1	1	1
2	2	2	1	1	2	1	2	1	24.8	1	1	2	1	1	1
2	2	2	1	1	2	1	2	1	24.45	1	2	2	2	1	1
2	2	1	1	1	2	3	2	1	22.6	1	2	1	1	1	1
2	2	2	1	1	2	1	2	1	27.78	3	1	1	1	1	1
2	2	2	1	1	2	2	2	1	19.82	1	1	1	1	1	1
2	2	2	1	2	2	1	2	1	26.23	3	2	2	2	1	1
2	2	2	1	2	2	2	1	1	28.41	3	2	2	2	1	1
2	2	2	1	1	1	2	2	1	28.72	3	2	2	2	1	1
2	2	2	1	1	2	1	2	1	28.08	3	2	1	1	1	1
2	2	2	2	1	2	3	2	1	24.07	1	1	2	1	1	1
2	2	1	2	2	2	1	2	1	25.1	3	1	2	1	1	1
2	2	2	2	2	1	3	2	1	24.91	1	1	1	1	1	1
2	2	2	1	1	2	3	1	1	29.26	3	1	1	1	1	1
2	2	2	2	1	2	2	3	1	23.15	1	1	2	1	1	1
2	2	2	2	1	2	2	1	1	19.59	1	2	2	2	1	1
2	2	2	3	1	2	3	2	1	20.28	1	2	2	2	1	1
2	2	2	2	2	2	1	2	1	26.81	3	2	2	1	1	1
2	2	2	2	1	2	2	1	1	24.3	1	2	2	2	1	1
2	2	2	2	1	2	1	2	1	24.42	1	1	2	2	1	1
2	2	1	2	1	2	1	2	1	24.11	1	2	2	1	1	1
2	2	2	2	2	2	1	2	1	29.02	3	1	2	2	1	1
2	2	2	1	2	2	1	2	1	26.51	3	2	2	1	1	1
2	2	2	2	1	2	2	3	1	23.15	1	1	2	1	1	1
2	2	2	2	1	2	3	2	1	22.94	1	2	2	2	1	1
2	2	2	1	2	2	2	2	1	30.19	3	2	2	2	1	1
2	2	2	2	1	2	1	2	1	20.05	1	2	1	2	1	1
2	2	2	3	1	2	1	1	1	26.42	3	2	2	2	1	1
2	2	2	1	1	2	1	2	1	27.17	3	1	2	2	1	1
2	2	2	2	1	2	3	2	1	20.72	1	2	2	2	1	1
2	2	2	1	1	1	3	2	1	22.2	1	2	2	1	1	1
2	2	2	2	2	1	3	3	1	24.49	1	2	2	2	1	1
2	2	2	2	1	2	3	2	1	28.73	3	1	1	1	1	1
2	2	2	1	1	2	1	2	1	29.41	3	1	2	2	1	1
2	2	1	2	2	1	3	2	1	27.76	3	2	1	1	1	1
2	2	2	3	2	1	3	2	1	26.53	3	1	1	1	1	1
2	2	2	1	1	2	3	1	1	17.99	2	2	1	1	1	2
2	2	2	1	1	2	1	2	1	28.41	3	1	2	2	1	1
2	2	1	1	2	2	1	2	1	35.89	3	2	2	1	1	1
2	2	2	1	2	2	2	1	1	25.65	3	2	2	1	1	1
2	2	2	1	2	2	2	2	1	19.79	1	1	1	2	1	1
2	2	2	1	2	2	1	2	1	21.46	1	2	2	2	1	1
2	2	2	1	1	2	2	1	1	19.59	1	2	2	2	1	1
2	2	1	1	1	2	3	2	1	26.4	3	1	2	2	1	1
2	2	1	2	1	2	3	2	1	17.58	2	2	2	1	1	1
2	2	2	1	2	2	1	2	1	26.51	3	2	2	1	1	1
2	2	2	1	1	2	3	2	1	29.65	3	2	2	2	1	1
2	2	1	1	2	2	1	2	1	21.8	1	2	2	1	1	1
2	2	1	1	1	2	2	2	1	22.46	1	1	2	1	1	1
2	2	2	1	2	2	1	2	1	26.81	3	2	2	1	1	1
2	2	2	1	1	1	3	2	1	25.95	3	2	1	1	1	1
2	2	1	1	2	2	2	2	1	28.6	3	1	2	2	1	1
2	2	1	1	2	2	2	2	1	29.07	3	2	2	2	1	1
2	2	2	1	2	2	3	3	1	22.04	1	2	1	1	1	1
2	2	2	1	1	2	2	2	1	26.3	3	2	2	1	1	1
2	2	2	1	1	2	1	2	1	22.47	1	1	2	1	1	1
2	2	2	1	1	2	3	2	1	28.29	3	2	2	1	1	1
2	2	2	1	2	2	2	2	1	30.19	3	2	2	2	1	1
2	2	2	1	1	2	3	2	1	24.03	1	2	2	2	1	1
2	2	2	1	1	2	3	2	1	29.98	3	2	2	1	1	1
2	2	1	1	2	2	2	2	1	33.74	3	2	2	1	1	1
2	2	2	1	1	2	2	2	1	22.15	1	2	1	1	1	1
2	2	2	1	1	2	1	1	1	25.26	3	1	1	2	1	1
2	2	2	1	1	2	3	2	1	24.03	1	2	2	2	1	1
2	2	2	1	1	2	2	2	1	26.59	3	2	2	2	1	1
2	2	2	1	1	2	3	1	1	25.01	3	1	2	2	1	1
2	2	2	1	1	2	1	2	1	24.11	1	2	2	1	1	1
2	2	2	1	2	2	2	2	1	24.84	1	2	2	1	1	1
2	2	1	1	2	2	2	2	1	28.6	3	1	2	2	1	1
2	2	2	1	2	2	2	2	1	29.65	3	2	2	2	1	1
2	2	1	1	1	2	2	3	1	20.52	1	2	2	1	1	1
2	2	2	1	1	2	3	2	1	20.28	1	2	1	1	1	1
3	2	1	1	1	1	2	2	1	26.99	3	1	2	2	1	1
3	2	1	1	1	1	1	2	1	20.57	1	2	2	2	1	2
3	2	2	2	1	1	3	2	1	23.44	1	1	2	1	1	1
3	2	1	1	2	1	3	2	1	23.51	1	1	1	2	1	1
3	2	2	1	1	2	2	2	1	26.4	3	2	2	1	1	1
1	1	2	1	1	2	1	2	1	17.47	2	1	2	1	2	1
1	1	2	2	2	2	3	1	1	26.56	3	1	2	2	2	2
1	1	2	2	1	2	2	2	1	17.1	2	1	1	2	2	1
1	1	2	2	1	2	3	1	1	20.31	1	1	2	2	2	1
1	1	2	2	1	2	3	1	1	16.61	2	1	1	2	2	1
1	1	2	2	1	2	3	1	1	20.2	1	1	2	2	2	1
1	1	2	2	1	2	3	2	1	19.29	1	1	1	2	2	1
1	1	2	2	1	2	3	2	1	19.38	1	1	2	2	2	1
1	1	2	2	1	2	3	1	1	22.27	1	1	1	2	2	1
1	1	2	2	2	2	2	2	1	20.7	1	1	2	2	2	1
1	1	2	2	1	2	3	2	1	22.04	1	1	2	1	2	1
1	1	2	1	1	2	3	1	1	18.75	1	1	1	1	2	1
1	1	2	2	2	2	3	2	1	25.22	3	1	1	2	2	1
1	1	2	1	1	2	3	2	1	24.46	1	1	2	2	2	1
1	1	2	2	2	2	2	2	1	18.96	1	1	1	1	2	1
1	1	2	2	1	2	3	2	1	19.38	1	1	2	2	2	1
1	1	2	2	1	2	3	2	1	22.04	1	1	2	1	2	1
1	1	2	2	1	2	3	1	1	16.61	2	1	2	1	2	1
1	1	2	2	1	2	3	2	1	22.04	1	1	1	1	2	1
1	1	2	2	2	2	3	2	1	25.22	3	1	1	2	2	1
1	1	2	1	2	2	2	2	1	18.13	2	1	2	1	2	1
1	1	2	2	1	2	2	1	1	20.7	1	2	1	2	2	1
1	1	2	1	1	2	3	2	1	21.72	1	1	2	2	2	1
1	1	2	2	1	2	2	2	1	17.1	2	1	1	2	2	1
1	1	2	1	1	2	3	1	1	16.94	2	1	1	2	2	1
1	1	2	2	1	2	3	1	1	22.06	1	1	1	2	2	1
1	1	2	2	1	2	2	3	1	20.96	1	1	1	2	2	1
1	1	2	2	1	2	3	1	1	20.2	1	1	1	1	2	1
1	1	2	1	1	2	3	2	1	21.09	1	1	1	1	2	1
1	1	2	2	1	2	2	3	1	29.64	3	1	1	2	2	2
1	1	2	1	2	2	2	2	1	20.08	1	1	1	2	2	1
1	1	2	2	1	2	2	2	1	19.53	1	1	1	2	2	1
1	1	2	2	2	2	2	2	1	24.17	1	1	2	1	2	1
1	1	1	2	2	2	1	2	1	23.44	1	1	1	1	2	1
1	1	1	2	2	2	1	2	1	30.45	3	1	1	1	2	1
1	1	1	2	2	2	1	2	1	23.44	1	1	1	1	2	1
1	1	2	2	1	2	1	3	1	19.71	1	1	1	1	2	2
1	1	2	1	1	2	3	2	1	20.83	1	1	2	1	2	1
1	1	1	1	2	2	2	1	1	20.2	1	1	1	1	2	1
1	1	2	2	1	2	2	2	1	27.34	3	1	1	1	2	1
1	1	2	1	1	2	2	2	1	21.48	1	1	1	1	2	1
1	1	1	1	2	2	3	2	1	26.95	3	1	1	1	2	1
1	1	2	1	2	2	3	1	1	19.53	1	1	1	1	2	2
1	1	1	1	1	2	2	2	1	26.62	3	1	1	1	2	1
1	1	1	1	1	2	2	2	1	26.62	3	1	1	1	2	1
1	1	2	1	1	2	3	2	1	24.91	1	1	1	1	2	1
1	1	2	1	1	2	3	2	1	20.57	1	1	2	2	2	1
1	1	2	1	2	2	2	3	1	23.83	1	1	1	2	2	1
1	1	1	1	1	2	3	2	1	23.18	1	1	1	1	2	1
1	1	2	1	1	2	3	2	1	20.57	1	1	2	2	2	1
1	1	2	1	1	2	3	1	1	24.22	1	1	2	2	2	1
1	1	2	1	1	2	2	2	1	25.39	3	1	1	2	2	1
1	1	2	1	1	2	3	2	1	20.83	1	1	2	1	2	1
1	1	2	1	1	2	2	2	1	19.53	1	1	1	2	2	1
1	1	2	1	1	2	3	2	1	21.72	1	1	2	2	2	1
1	1	2	1	2	1	3	2	1	25.51	3	1	1	2	2	1
1	1	2	1	1	2	1	2	1	27.01	3	1	2	1	2	1
1	1	1	1	1	2	3	1	1	22.86	1	2	1	1	2	1
1	1	2	1	2	2	3	2	1	22.22	1	1	1	1	2	1
1	1	2	1	1	2	3	1	1	20.07	1	1	2	2	2	1
1	1	2	1	1	2	3	1	1	22.27	1	1	1	2	2	1
1	1	2	1	2	2	3	1	1	20.32	1	1	1	1	2	1
1	1	2	1	2	2	2	2	1	18.13	2	1	2	1	2	1
1	1	2	1	2	2	3	2	1	22.66	1	1	1	1	2	1
1	1	2	2	1	2	1	3	1	19.71	1	1	1	1	2	2
1	1	2	3	2	2	2	2	1	19.23	1	2	2	2	2	1
1	1	2	3	2	2	2	2	1	19.23	1	2	2	2	2	1
1	1	1	1	1	2	3	2	1	23.18	1	1	1	1	2	1
1	1	2	1	1	2	2	1	1	17.91	2	1	1	1	2	1
1	1	2	1	1	2	2	2	1	25.39	3	1	1	2	2	1
1	1	2	1	1	2	3	1	1	18.75	1	1	1	1	2	1
1	1	2	1	2	2	2	2	1	23.51	1	1	1	1	2	1
1	1	2	1	1	2	3	1	1	16.94	2	1	1	2	2	1
1	1	2	1	1	2	2	2	1	21.48	1	1	1	1	2	1
1	1	2	1	2	2	3	2	1	20.2	1	1	1	1	2	1
1	1	2	1	1	2	3	1	1	27.64	3	2	1	2	2	1
1	1	2	1	2	2	3	2	1	20.2	1	1	1	1	2	1
1	1	2	1	2	2	2	2	1	18.96	1	1	1	1	2	1
1	1	2	1	1	2	2	1	1	20.2	1	2	2	2	2	1
1	1	1	1	1	2	3	1	1	20.96	1	1	1	2	2	1
1	1	2	1	2	2	3	3	1	20.03	1	1	1	1	2	1
1	1	1	1	1	2	2	2	1	20.03	1	1	2	2	2	1
1	1	1	1	1	2	3	2	1	17.91	2	1	1	1	2	1
1	1	2	1	2	2	3	2	1	22.66	1	1	1	1	2	1
1	1	2	1	1	2	3	2	1	24.22	1	1	1	1	2	1
1	1	2	1	1	2	3	2	1	24.46	1	1	2	2	2	1
1	1	1	1	2	2	2	3	1	23.83	1	1	1	2	2	1
1	1	1	1	1	2	2	2	1	20.03	1	1	2	2	2	1
1	1	2	1	1	2	2	2	1	17.92	2	1	2	2	2	1
1	1	2	1	1	2	3	1	1	16.77	2	1	2	1	2	1
1	1	1	1	2	2	2	2	1	23.44	1	1	1	2	2	1
1	1	2	1	2	2	1	1	1	19.83	1	1	1	1	2	1
1	1	1	1	1	2	3	2	1	22.22	1	1	1	2	2	1
1	1	2	1	1	2	2	1	1	17.91	2	1	1	1	2	1
1	1	2	1	1	2	3	1	1	20.03	1	1	1	1	2	1
1	1	2	1	1	2	3	2	1	17.91	2	1	1	1	2	1
1	1	2	1	2	2	2	2	1	20.7	1	1	2	2	2	1
1	1	2	1	1	2	2	2	1	19.84	1	1	2	2	2	1
1	1	2	1	1	2	2	1	1	18.75	1	1	1	2	2	1
1	1	2	1	2	2	2	2	1	17.58	2	1	1	1	2	1
1	1	2	1	1	2	3	1	1	24.22	1	1	2	2	2	1
1	1	2	2	1	2	2	1	1	20.7	1	2	1	2	2	1
1	1	2	1	1	2	2	2	1	23.05	1	1	1	2	2	1
1	1	1	1	2	2	3	2	1	22.22	1	1	1	1	2	1
1	1	2	1	1	2	3	2	1	24.22	1	1	1	1	2	1
1	2	2	1	1	2	1	2	1	24.49	1	2	1	2	2	1
1	2	2	3	1	2	1	1	1	38.74	3	2	1	1	2	2
1	2	2	3	1	1	3	2	1	24.15	1	2	2	1	2	1
1	2	2	1	1	2	1	3	1	27.68	3	2	2	2	2	1
1	2	1	1	2	1	3	1	1	21.22	1	2	2	1	2	1
1	2	2	1	1	2	1	2	1	22.84	1	1	2	1	2	1
1	2	2	1	1	1	3	2	1	21.97	1	2	2	2	2	1
1	2	2	1	1	2	1	3	1	27.68	3	2	2	2	2	1
1	2	1	3	1	2	3	2	1	25.71	3	1	1	1	2	1
1	2	2	2	1	2	3	2	1	23.36	1	2	2	2	2	1
1	2	1	1	2	1	2	2	1	22.86	1	2	2	2	2	1
1	2	1	1	1	2	2	1	1	26.06	3	2	2	2	2	1
1	2	2	2	1	2	3	1	1	25.82	3	1	2	1	2	1
1	2	2	2	2	2	2	1	1	26.88	3	2	2	1	2	1
1	2	2	2	1	1	3	1	1	26.57	3	2	2	2	2	1
1	2	2	2	2	1	3	2	1	25.06	3	1	2	1	2	1
1	2	2	3	2	2	3	1	1	25.74	3	2	2	2	2	1
1	2	1	3	1	1	3	1	1	22.34	1	2	1	2	2	1
1	2	2	1	1	1	3	2	1	28.73	3	2	2	2	2	1
1	2	2	2	1	2	3	2	1	23.66	1	2	2	2	2	1
1	2	1	1	1	1	3	2	1	19.95	1	2	2	1	2	1
1	2	2	1	2	1	2	2	1	24.73	1	2	2	1	2	1
1	2	2	1	1	1	2	1	1	26.12	3	1	2	1	2	1
1	2	2	2	1	2	2	1	1	21.01	1	1	2	1	2	1
1	2	2	2	1	2	2	2	1	19.27	1	2	2	2	2	1
1	2	1	1	1	2	3	2	1	28.37	3	2	2	2	2	1
1	2	2	1	1	2	2	2	1	23.15	1	2	2	2	2	1
1	2	2	2	1	2	3	1	1	21.6	1	2	2	2	2	1
1	2	2	1	1	2	2	2	1	28.98	3	1	2	1	2	1
1	2	2	2	2	2	3	1	1	23.57	1	2	2	2	2	1
1	2	2	2	1	2	2	1	1	19.59	1	2	2	1	2	1
1	2	2	2	1	2	3	2	1	28.4	3	2	2	2	2	2
1	2	2	3	1	2	3	1	1	23.18	1	2	2	2	2	1
1	2	2	3	1	2	3	1	1	23.18	1	2	2	2	2	1
1	2	2	2	1	2	3	2	1	25.38	3	1	2	2	2	1
1	2	2	2	1	1	3	1	1	22.99	1	1	2	2	2	1
1	2	2	2	1	2	2	2	1	25.26	3	2	2	2	2	1
1	2	2	2	1	2	2	1	1	22.6	1	2	2	2	2	1
1	2	2	2	2	2	3	1	1	22.49	1	1	2	1	2	2
1	2	2	2	1	2	3	2	1	28.4	3	2	2	2	2	2
1	2	2	3	1	2	3	2	1	31.22	3	1	2	1	2	1
1	2	2	1	1	2	3	2	1	24.22	1	1	2	1	2	1
1	2	2	1	2	2	3	1	1	26.57	3	2	2	1	2	1
1	2	1	1	1	2	2	1	1	31.86	3	1	2	2	2	1
1	2	2	1	1	2	3	1	1	18.31	2	2	1	2	2	1
1	2	2	1	1	2	2	2	1	23.15	1	2	2	1	2	1
1	2	2	1	1	1	3	1	1	20.76	1	2	2	1	2	1
1	2	2	1	2	2	2	1	1	19.88	1	2	1	1	2	1
1	2	2	1	1	2	2	1	1	35.26	3	2	1	2	2	1
1	2	1	1	1	2	3	2	1	25.95	3	2	2	1	2	1
1	2	1	1	1	2	3	2	1	26.59	3	2	2	1	2	1
1	2	2	1	1	2	3	1	1	21.15	1	2	2	1	2	1
1	2	1	1	1	2	2	1	1	31.86	3	1	2	2	2	1
1	2	2	1	1	2	1	2	1	24.3	1	2	2	2	2	1
1	2	2	1	1	2	2	2	1	22.86	1	2	2	1	2	1
1	2	1	1	2	2	3	1	1	29.73	3	2	2	2	2	1
1	2	2	1	1	1	3	1	1	28.34	3	2	2	1	2	1
1	2	1	1	1	1	3	1	1	18.72	1	2	2	2	2	1
1	2	2	1	1	1	3	2	1	27.77	3	2	2	1	2	1
1	2	1	1	2	1	3	1	1	23.84	1	2	2	2	2	1
1	2	2	1	1	2	2	1	1	22.32	1	1	2	2	2	1
1	2	1	1	1	1	2	1	1	26.79	3	1	2	1	2	1
1	2	1	1	1	2	3	2	1	24.54	1	1	2	1	2	1
1	2	1	1	1	2	2	3	1	26.06	3	2	1	1	2	1
1	2	2	1	1	2	3	2	1	25.38	3	1	2	2	2	1
1	2	2	1	1	2	2	2	1	26.88	3	2	2	1	2	1
1	2	1	1	1	2	1	2	1	23.88	1	1	2	2	2	1
1	2	2	1	2	2	1	2	1	30.86	3	1	1	1	2	1
1	2	2	1	1	2	2	2	1	22.86	1	2	2	1	2	1
1	2	2	1	1	2	3	1	1	22.41	1	1	1	1	2	1
1	2	2	1	1	1	3	1	1	20.76	1	2	2	1	2	1
1	2	2	1	2	2	2	2	1	21.98	1	2	2	1	2	1
1	2	2	1	1	2	2	2	1	33.06	3	2	2	1	2	1
1	2	1	1	1	2	3	1	1	22.41	1	2	2	2	2	1
1	2	1	1	1	2	2	1	1	26.06	3	2	2	2	2	1
1	2	1	1	1	2	3	2	1	23.15	1	2	2	2	2	1
1	2	2	1	2	2	3	1	1	26.57	3	2	2	1	2	1
1	2	1	1	1	2	2	1	1	21.97	1	1	2	1	2	1
1	2	2	1	1	2	3	2	1	29	3	2	1	2	2	1
1	2	2	1	1	2	3	1	1	21.15	1	2	2	1	2	1
1	2	2	1	1	2	2	1	1	21.05	1	2	2	2	2	1
1	2	2	1	1	1	3	1	1	23.03	1	2	2	2	2	1
1	2	2	1	1	2	3	1	1	23.94	1	1	2	1	2	1
1	2	2	1	2	1	3	1	1	20.9	1	2	2	2	2	1
1	2	2	1	1	1	3	1	1	24.11	1	2	2	1	2	1
1	2	2	1	1	1	3	1	1	19.15	1	2	2	2	2	1
1	2	2	1	2	2	2	2	1	29.22	3	2	2	1	2	1
1	2	2	1	2	2	2	1	1	21.22	1	1	1	1	2	1
1	2	2	1	2	2	2	2	1	22.04	1	2	2	2	2	1
1	2	2	1	2	2	2	2	1	29.32	3	2	2	2	2	1
1	2	2	1	2	2	2	2	1	22.86	1	1	2	1	2	1
1	2	1	1	1	2	2	1	1	22.32	1	1	2	2	2	1
1	2	2	1	1	1	3	1	1	23.03	1	2	2	2	2	1
1	2	2	1	1	2	3	2	1	22.65	1	1	2	2	2	1
1	2	2	1	1	2	1	1	1	21.78	1	1	2	1	2	1
1	2	2	1	1	2	3	1	1	18.72	1	2	1	2	2	1
1	2	2	1	1	1	3	2	1	18.29	2	1	2	1	2	1
1	2	2	1	1	1	3	2	1	24.49	1	2	2	1	2	1
1	2	1	1	1	2	3	1	1	21.85	1	1	1	2	2	1
1	2	1	1	1	1	3	1	1	32.65	3	2	2	1	2	1
1	2	2	1	1	2	2	1	1	23.18	1	2	2	2	2	1
1	2	2	1	2	2	2	1	1	20.52	1	2	2	1	2	1
1	2	2	1	2	2	2	1	1	20.99	1	2	2	2	2	1
1	2	1	1	1	2	3	1	1	19.38	1	1	2	1	2	1
1	2	2	1	2	1	2	2	1	28.03	3	2	2	1	2	1
1	2	2	1	1	2	3	1	1	24.06	1	2	2	2	2	1
1	2	1	1	1	2	1	2	1	29.4	3	2	2	1	2	1
1	2	2	1	2	2	2	2	1	22.86	1	2	2	2	2	2
1	2	2	1	1	1	3	2	1	27.68	3	2	1	2	2	1
1	2	2	2	1	2	3	1	1	29.06	3	2	2	1	2	1
1	2	2	1	1	2	3	1	1	21.39	1	2	2	1	2	1
1	2	1	1	1	2	3	2	1	23.37	1	2	1	2	2	2
1	2	2	1	1	2	3	1	1	24.06	1	2	2	2	2	1
1	2	2	1	1	2	3	2	1	23.89	1	2	2	2	2	1
1	2	2	1	1	2	2	1	1	20.06	1	2	2	1	2	1
1	2	2	1	1	2	3	1	1	20.06	1	1	2	1	2	1
1	2	1	1	1	2	2	1	1	21.22	1	2	2	2	2	1
2	1	2	1	1	2	3	2	1	20.43	1	1	2	1	2	1
2	1	2	2	2	2	1	2	1	37.11	3	1	1	2	2	1
2	1	2	2	2	2	3	2	1	19.92	1	1	2	1	2	1
2	1	2	2	2	2	1	2	1	23.31	1	1	1	1	2	1
2	1	1	1	2	1	2	3	1	20.08	1	1	2	2	2	1
2	1	2	1	2	2	2	3	1	20.17	1	1	1	1	2	1
2	1	2	2	2	2	1	2	1	27.1	3	1	1	1	2	1
2	1	2	2	1	2	1	2	1	24.01	1	2	2	2	2	1
2	1	2	1	1	2	3	2	1	20.43	1	1	2	1	2	1
2	1	1	2	2	2	1	2	1	23.44	1	1	2	1	2	1
2	1	1	1	1	2	2	2	1	23.62	1	1	1	1	2	1
2	1	2	2	2	2	3	2	1	19.92	1	1	2	1	2	1
2	1	1	1	1	2	1	2	1	23.53	1	1	1	1	2	1
2	1	2	1	2	2	2	2	1	18.75	1	1	1	2	2	1
2	1	2	1	2	2	1	2	1	23.51	1	1	1	2	2	1
2	1	2	1	2	2	1	2	1	26.26	3	1	1	1	2	1
2	1	2	1	2	2	1	2	1	28.23	3	1	1	1	2	1
2	1	2	1	2	2	2	2	1	18.18	2	1	1	2	2	1
2	1	2	1	2	2	2	3	1	26.56	3	1	1	1	2	1
2	1	1	1	2	1	2	3	1	20.08	1	1	2	2	2	1
2	1	2	1	1	2	1	2	1	24.22	1	1	1	2	2	1
2	1	2	1	2	2	1	2	1	23.44	1	1	2	1	2	1
2	1	2	1	2	2	2	3	1	26.56	3	1	1	1	2	1
2	1	2	1	2	2	3	2	1	24.01	1	1	2	2	2	1
2	1	2	1	2	2	2	2	1	18.75	1	1	1	2	2	1
2	1	2	1	2	2	2	2	1	18.18	2	1	1	2	2	1
2	1	2	1	2	2	1	2	1	25.69	3	1	2	1	2	1
2	1	1	1	1	2	3	3	1	19.11	1	1	1	2	2	1
2	1	2	1	2	2	1	2	1	27.1	3	1	1	1	2	1
2	1	2	1	1	2	1	2	1	24.22	1	1	1	2	2	1
2	1	2	1	2	2	2	3	1	20.17	1	1	1	1	2	1
2	1	2	1	2	2	1	2	1	26.26	3	1	1	1	2	1
2	1	2	1	2	2	2	3	1	21.63	1	1	1	2	2	1
2	1	2	1	2	2	2	3	1	21.63	1	1	1	2	2	1
2	1	2	2	1	2	2	2	1	16.8	2	1	2	2	2	1
2	1	2	1	2	2	2	1	1	27.34	3	1	1	2	2	1
2	1	2	2	2	2	3	1	1	35.65	3	1	2	1	2	2
2	1	2	2	1	2	2	2	1	23.01	1	1	1	1	2	1
2	1	2	3	2	2	2	2	1	20.2	1	1	2	1	2	1
2	1	2	1	2	2	1	2	1	26.81	3	1	1	2	2	1
2	1	2	1	2	2	2	2	1	22.76	1	1	1	2	2	1
2	1	2	2	2	2	3	1	1	18.08	2	1	1	2	2	1
2	1	2	2	2	2	2	2	1	23.53	1	1	1	1	2	1
2	1	2	1	2	2	1	2	1	21.26	1	1	1	2	2	1
2	1	2	2	2	2	1	2	1	23.92	1	1	2	2	2	2
2	1	2	2	2	2	1	2	1	21.26	1	1	1	2	2	1
2	1	1	2	1	2	2	2	1	23.71	1	1	1	2	2	1
2	1	2	2	2	2	1	3	1	19.98	1	1	1	1	2	1
2	1	2	1	2	2	2	2	1	23.44	1	1	1	1	2	1
2	1	2	2	2	2	1	2	1	23.92	1	1	2	2	2	2
2	1	2	1	2	2	2	1	1	20.2	1	1	1	1	2	1
2	1	1	1	2	2	2	2	1	24.46	1	1	2	1	2	2
2	1	2	1	2	2	1	2	1	19.96	1	1	1	2	2	1
2	1	1	2	2	2	3	2	1	27.34	3	1	1	2	2	1
2	1	2	2	2	2	3	2	1	27.94	3	1	1	2	2	1
2	1	2	2	2	2	1	2	1	31.14	3	1	1	1	2	2
2	1	1	3	2	2	2	2	1	21.97	1	1	1	1	2	1
2	1	2	1	2	1	2	2	1	23.42	1	1	1	2	2	1
2	1	1	1	2	2	2	2	1	24.46	1	1	2	1	2	2
2	1	2	1	2	2	2	2	1	23.44	1	1	1	1	2	1
2	1	2	1	2	2	3	2	1	24.46	1	1	1	1	2	1
2	1	1	1	2	2	2	2	1	24.77	1	1	1	1	2	2
2	1	1	1	1	2	3	2	1	23.44	1	1	1	1	2	1
2	1	2	1	2	2	2	2	1	16.8	2	1	1	1	2	1
2	1	2	1	2	2	1	2	1	19.84	1	1	1	2	2	1
2	1	2	1	1	2	3	1	1	17.26	2	1	1	1	2	1
2	1	2	1	1	2	2	2	1	17.63	2	1	1	2	2	1
2	1	2	1	2	2	2	2	1	21.87	1	1	1	2	2	1
2	1	1	1	2	2	2	2	1	24.74	1	1	1	1	2	1
2	1	2	1	2	2	2	3	1	19.72	1	1	1	1	2	1
2	1	1	1	1	2	1	1	1	26.37	3	1	1	2	2	1
2	1	2	1	1	2	3	2	1	20.17	1	1	1	1	2	1
2	1	2	1	2	2	1	2	1	18.78	1	1	1	1	2	1
2	1	1	1	2	2	2	2	1	22.76	1	1	1	2	2	1
2	1	2	1	2	2	2	2	1	18.36	2	1	1	2	2	1
2	1	2	1	2	2	1	2	1	24.22	1	1	1	1	2	1
2	1	2	1	1	2	1	2	1	18	2	1	1	1	2	1
2	1	1	1	2	2	2	1	1	20.2	1	1	1	1	2	1
2	1	1	1	2	2	1	2	1	22.19	1	1	1	2	2	1
2	1	2	1	1	2	2	2	1	23.01	1	1	1	1	2	1
2	1	2	1	1	2	3	2	1	21.01	1	1	1	1	2	1
2	1	1	1	1	2	3	2	1	19.57	1	1	1	1	2	1
2	1	2	1	2	2	2	3	1	19.72	1	1	1	1	2	1
2	1	1	1	1	2	2	2	1	23.71	1	1	1	2	2	1
2	1	2	1	2	2	3	1	1	17.36	2	1	1	2	2	1
2	1	2	1	1	2	2	2	1	19.71	1	1	1	2	2	1
2	1	2	1	2	2	3	3	1	22.06	1	1	2	1	2	1
2	1	2	1	2	2	1	2	1	16.41	2	1	1	2	2	1
2	1	1	1	2	2	2	2	1	24.77	1	1	1	1	2	2
2	1	2	1	1	2	2	1	1	21.19	1	1	2	1	2	1
2	1	2	1	2	2	1	2	1	30.44	3	1	1	2	2	1
2	1	2	1	2	2	3	2	1	30.48	3	1	1	1	2	1
2	1	2	1	1	2	2	2	1	17.63	2	1	1	2	2	1
2	1	2	1	1	2	1	2	1	18.36	2	1	1	2	2	1
2	1	1	1	1	2	3	2	1	23.44	1	1	1	1	2	1
2	1	2	1	2	2	2	3	1	23.44	1	1	2	2	2	1
2	1	2	1	2	2	2	2	1	16.41	2	1	1	1	2	1
2	1	2	1	2	2	2	2	1	22.04	1	1	1	1	2	1
2	1	2	1	2	2	2	2	1	23.39	1	1	1	1	2	1
2	1	1	1	1	2	2	2	1	23.95	1	1	2	2	2	1
2	1	2	1	2	2	2	2	1	16.8	2	1	1	1	2	1
2	2	2	3	2	2	1	3	1	23.67	1	2	2	2	2	1
2	2	1	1	1	2	1	2	1	21.34	1	1	2	1	2	1
2	2	2	1	2	1	2	3	1	29.98	3	2	2	2	2	1
2	2	2	1	2	2	3	1	1	29.35	3	2	1	1	2	1
2	2	2	1	1	2	1	2	1	24.49	1	2	2	2	2	1
2	2	2	1	2	2	1	2	1	24.62	1	1	1	1	2	1
2	2	2	2	1	2	1	2	1	21.72	1	2	2	2	2	1
2	2	1	2	1	1	3	1	1	27.18	3	2	1	1	2	1
2	2	2	1	1	2	1	2	1	29.63	3	2	2	2	2	1
2	2	2	1	2	2	2	2	1	26.67	3	1	1	2	2	1
2	2	2	1	1	1	2	2	1	26.17	3	2	2	2	2	1
2	2	2	1	2	2	2	2	1	22.72	1	2	2	1	2	1
2	2	2	1	1	2	3	2	1	26.45	3	2	2	2	2	1
2	2	2	2	1	2	1	1	1	23.89	1	2	2	1	2	1
2	2	2	2	2	2	1	2	1	27.99	3	2	1	2	2	1
2	2	1	3	2	1	3	2	1	25.51	3	2	2	1	2	1
2	2	1	2	1	2	1	2	1	25.43	3	1	2	2	2	1
2	2	2	2	1	2	1	2	1	26.93	3	1	2	2	2	1
2	2	2	1	2	1	2	2	1	32.04	3	1	1	1	2	2
2	2	2	3	2	1	3	2	1	25.38	3	2	2	1	2	1
2	2	1	1	1	2	2	2	1	27.1	3	2	1	2	2	1
2	2	2	2	2	2	1	2	1	27.99	3	2	1	2	2	1
2	2	2	1	1	2	2	2	1	22.2	1	2	2	2	2	1
2	2	2	2	1	2	3	3	1	23.15	1	2	2	1	2	1
2	2	1	2	1	2	3	2	1	22.34	1	2	2	1	2	1
2	2	2	2	1	2	1	1	1	19.15	1	2	2	2	2	1
2	2	2	2	1	2	1	2	1	26.93	3	1	2	2	2	1
2	2	2	1	2	2	1	2	1	25.86	3	1	2	1	2	1
2	2	2	2	1	2	2	2	1	30.12	3	2	2	2	2	2
2	2	2	3	1	1	2	1	1	29.98	3	2	2	1	2	2
2	2	2	2	1	2	2	2	1	27.28	3	2	2	1	2	1
2	2	2	2	2	2	3	2	1	29.4	3	2	2	2	2	1
2	2	2	2	2	2	2	2	1	25.25	3	2	2	2	2	1
2	2	1	1	1	2	1	2	1	24.15	1	2	2	1	2	2
2	2	2	2	1	2	1	2	1	29.07	3	1	2	1	2	2
2	2	2	3	1	2	1	2	1	25.38	3	2	1	1	2	1
2	2	2	1	1	2	1	1	1	23.89	1	2	2	1	2	1
2	2	2	1	2	2	2	1	1	24.28	1	2	2	2	2	1
2	2	2	1	1	1	2	1	1	27.76	3	2	1	2	2	1
2	2	1	1	1	2	1	1	1	24.91	1	2	2	1	2	1
2	2	2	1	2	2	1	2	1	23.77	1	2	2	2	2	1
2	2	1	1	1	2	1	2	1	21.6	1	2	2	1	2	1
2	2	1	1	2	2	3	2	1	25.61	3	1	1	2	2	1
2	2	2	1	1	1	2	2	1	24.51	1	1	2	1	2	1
2	2	2	1	1	2	2	2	1	26.12	3	2	2	2	2	1
2	2	2	1	2	2	1	2	1	30.08	3	1	1	2	2	1
2	2	2	1	2	2	3	2	1	27.68	3	2	2	2	2	1
2	2	2	1	1	2	2	2	1	22.2	1	2	2	2	2	1
2	2	2	1	2	2	3	2	1	26.83	3	1	2	2	2	1
2	2	2	1	1	2	2	1	1	28.41	3	2	1	2	2	1
2	2	2	1	1	1	2	2	1	24.51	1	1	2	1	2	1
2	2	1	1	2	2	3	2	1	25.61	3	1	1	2	2	1
2	2	2	1	1	2	1	2	1	26.99	3	1	2	2	2	1
2	2	2	3	2	2	3	2	1	23.12	1	2	2	1	2	1
2	2	2	2	1	2	3	2	1	22.94	1	2	2	2	2	1
2	2	1	2	2	2	3	2	1	21.14	1	2	2	2	2	1
2	2	2	2	1	2	1	2	1	28.41	3	1	2	2	2	1
2	2	2	2	1	2	2	1	1	32.87	3	1	2	2	2	1
2	2	2	1	2	2	3	3	1	29.75	3	2	2	1	2	1
2	2	2	1	1	2	1	2	1	29.76	3	1	1	1	2	1
2	2	2	1	2	2	1	2	1	26.28	3	2	2	2	2	1
2	2	2	2	2	2	3	2	1	24.44	1	2	2	2	2	1
2	2	2	1	1	2	3	2	1	19.49	1	2	2	1	2	1
2	2	2	3	2	2	3	2	1	23.12	1	2	2	1	2	1
2	2	2	2	2	2	2	3	1	23.41	1	2	2	2	2	1
2	2	2	1	2	2	1	2	1	27.68	3	1	1	1	2	1
2	2	2	3	1	2	3	2	1	20.28	1	2	2	2	2	1
2	2	1	1	1	2	3	1	1	28.4	3	1	2	2	2	1
2	2	2	2	1	2	2	2	1	22.86	1	1	1	1	2	2
2	2	2	2	2	2	3	1	1	27.1	3	2	2	2	2	1
2	2	2	1	2	2	2	2	1	27.38	3	2	2	1	2	2
2	2	2	2	2	2	3	2	1	26.17	3	1	2	1	2	1
2	2	2	2	1	2	2	2	1	28.73	3	2	2	1	2	1
2	2	2	1	2	1	2	2	1	28.41	3	1	1	2	2	1
2	2	2	1	1	1	3	2	1	20.69	1	1	2	2	2	1
2	2	2	3	1	2	3	2	1	29.76	3	2	2	1	2	1
2	2	2	1	1	1	3	2	1	19.59	1	2	2	2	2	1
2	2	2	1	1	1	3	2	1	24.91	1	2	2	1	2	1
2	2	2	2	2	2	2	2	1	27.17	3	1	2	2	2	2
2	2	2	1	2	2	2	2	1	21.22	1	2	2	2	2	1
2	2	1	1	2	2	2	2	1	20.28	1	2	2	1	2	2
2	2	2	2	1	2	2	2	1	26.09	3	1	2	2	2	1
2	2	2	1	1	2	3	2	1	29.39	3	2	2	1	2	1
2	2	2	2	2	2	1	1	1	28.08	3	2	2	1	2	2
2	2	2	1	1	2	3	2	1	27.08	3	2	2	1	2	1
2	2	2	1	1	2	1	2	1	36.78	3	2	1	1	2	1
2	2	2	1	1	1	2	3	1	25.21	3	2	2	1	2	1
2	2	2	1	1	1	3	2	1	26.12	3	2	1	1	2	2
2	2	2	1	1	2	2	2	1	26.59	3	2	2	2	2	1
2	2	2	1	1	2	3	2	1	22.86	1	2	2	2	2	1
2	2	1	1	1	2	3	2	1	24.69	1	2	2	1	2	1
2	2	2	1	1	2	3	2	1	27.17	3	2	2	2	2	1
2	2	2	1	1	2	2	2	1	29.7	3	2	2	2	2	1
2	2	2	1	2	2	1	2	1	28.41	3	2	2	2	2	1
2	2	2	1	1	2	1	2	1	28.09	3	1	2	1	2	1
2	2	2	1	2	1	3	1	1	27.17	3	2	2	2	2	1
2	2	2	1	2	2	3	2	1	24.44	1	2	2	2	2	1
2	2	2	1	2	2	2	1	1	23.67	1	2	2	1	2	1
2	2	1	1	1	1	3	2	1	25.65	3	1	1	2	2	1
2	2	2	1	1	2	3	2	1	19.49	1	2	2	1	2	1
2	2	2	1	2	2	2	2	1	29.65	3	2	2	2	2	1
2	2	2	1	2	2	3	3	1	29.35	3	2	1	1	2	1
2	2	1	1	1	1	3	2	1	25.35	3	1	2	2	2	1
2	2	1	1	1	1	3	2	1	22.94	1	2	2	2	2	1
2	2	2	1	2	2	1	2	1	21.46	1	2	2	2	2	1
2	2	1	1	1	2	2	2	1	27.76	3	2	2	2	2	1
2	2	2	1	2	2	3	2	1	27.68	3	2	1	1	2	1
2	2	2	1	1	2	1	2	1	21.72	1	2	2	2	2	1
2	2	1	1	2	2	1	2	1	27.68	3	1	1	1	2	1
2	2	2	1	1	2	1	2	1	29.76	3	1	1	1	2	1
2	2	1	1	2	2	2	2	1	22.32	1	2	2	1	2	1
2	2	2	1	1	2	3	2	1	19.59	1	2	2	1	2	1
2	2	1	1	1	2	2	2	1	21.55	1	2	2	2	2	1
2	2	1	1	1	2	2	2	1	27.76	3	2	2	2	2	1
2	2	2	1	2	2	2	3	1	24.69	1	2	2	1	2	1
2	2	1	1	1	2	3	2	1	24.69	1	2	2	1	2	1
2	2	1	1	2	2	2	2	1	22.32	1	2	2	1	2	1
2	2	2	1	1	2	3	2	1	29.65	3	2	2	2	2	1
2	2	2	1	2	2	1	2	1	28.41	3	2	2	2	2	1
2	2	2	1	1	2	2	1	1	24.3	1	2	2	2	2	1
2	2	2	1	1	2	2	2	1	25.54	3	2	2	2	2	2
2	2	2	1	1	2	3	1	1	25.01	3	1	2	2	2	1
2	2	2	1	2	2	1	2	1	24.38	1	2	2	2	2	1
2	2	2	1	1	2	1	2	1	25.44	3	2	2	1	2	1
3	2	2	1	1	1	2	2	1	27.36	3	1	1	2	2	1
3	2	2	1	1	1	3	2	1	26.45	3	1	2	2	2	1
3	2	2	1	1	1	3	2	1	25.96	3	1	2	2	2	1
3	2	2	2	1	1	3	2	1	21.97	1	1	1	1	2	1
3	2	1	1	2	1	3	2	1	23.59	1	1	1	2	2	1
3	2	2	1	1	2	1	2	1	26.89	3	1	2	2	2	2
1	1	2	1	1	2	1	2	2	21.64	1	1	2	2	1	1
1	1	2	1	2	1	3	3	2	30.84	3	1	2	1	1	1
1	1	2	1	1	2	3	2	2	31.25	3	1	1	1	1	1
1	1	2	1	2	2	2	2	2	34.37	3	1	2	2	1	1
1	2	2	1	1	2	1	2	2	25.65	3	2	2	2	1	1
1	2	2	2	1	2	1	2	2	24.42	1	2	2	1	1	1
1	2	2	2	1	2	3	2	2	30.1	3	2	2	1	1	2
1	2	1	1	1	1	3	1	2	26.47	3	2	2	2	1	1
1	2	2	1	1	2	1	2	2	25.65	3	2	2	2	1	1
1	2	1	1	2	1	3	1	2	27.74	3	1	1	1	1	1
1	2	2	2	2	2	2	2	2	22.86	1	2	2	2	1	1
1	2	1	1	2	2	2	2	2	20.76	1	2	2	2	1	1
1	2	2	2	2	2	2	2	2	26.57	3	2	2	2	1	1
1	2	2	1	2	1	2	2	2	32.19	3	1	1	2	1	1
1	2	1	1	1	2	2	3	2	25.95	3	2	2	2	1	1
1	2	2	1	1	2	1	2	2	22.84	1	1	2	1	1	1
1	2	2	1	1	2	3	2	2	27.76	3	1	1	1	1	1
1	2	2	2	1	2	1	2	2	20.24	1	1	2	1	1	1
1	2	2	1	1	2	3	2	2	26.06	3	2	2	2	1	1
1	2	2	1	1	2	1	2	2	24.57	1	2	2	1	1	1
1	2	2	1	1	2	1	2	2	22.49	1	1	2	2	1	1
1	2	1	1	2	2	2	2	2	25.35	3	2	1	1	1	1
1	2	2	1	1	2	1	3	2	25.76	3	1	1	2	1	1
2	1	2	2	1	2	1	2	2	20.45	1	1	2	1	1	2
2	1	2	2	2	2	1	2	2	20.81	1	1	1	1	1	1
2	1	2	1	2	1	3	2	2	31.22	3	1	1	1	1	1
2	1	2	1	1	2	1	2	2	22.86	1	1	2	2	1	1
2	1	2	2	1	2	3	2	2	25.71	3	1	1	1	1	1
2	1	2	1	2	2	3	2	2	22.43	1	1	2	1	1	1
2	1	1	3	2	2	1	2	2	25.91	3	1	1	1	1	1
2	1	2	2	1	2	1	2	2	20.45	1	1	2	1	1	2
2	1	2	1	1	2	3	2	2	24.97	1	1	2	1	1	1
2	1	2	1	1	2	3	2	2	21.51	1	1	2	1	1	1
2	1	2	2	2	2	1	2	2	25.91	3	1	2	2	1	1
2	1	2	2	2	2	2	2	2	27.94	3	1	1	1	1	1
2	1	2	1	2	1	1	3	2	43.71	3	1	1	2	1	1
2	1	2	1	1	2	1	2	2	19.33	1	1	1	1	1	1
2	1	2	2	2	1	3	3	2	30.84	3	1	2	1	1	1
2	1	1	1	2	2	1	2	2	18.36	2	1	1	2	1	1
2	1	2	1	1	2	1	2	2	21.64	1	1	2	2	1	1
2	1	1	1	1	2	1	2	2	20.7	1	1	1	2	1	1
2	1	1	3	2	2	1	2	2	25.91	3	1	1	1	1	1
2	1	2	1	1	2	3	2	2	21.51	1	1	2	1	1	1
2	1	2	2	1	2	1	3	2	22.86	1	1	1	2	1	1
2	1	2	1	1	2	1	2	2	22.86	1	1	2	1	1	1
2	1	2	1	1	2	3	2	2	20.96	1	1	1	1	1	1
2	1	1	1	2	1	1	2	2	23.92	1	1	1	1	1	1
2	1	2	1	2	2	1	2	2	25.24	3	1	1	2	1	1
2	1	2	1	1	2	1	2	2	22.27	1	1	2	1	1	1
2	1	2	1	1	2	1	2	2	22.86	1	1	2	2	1	1
2	1	1	1	2	2	1	2	2	18.36	2	1	1	2	1	1
2	1	2	1	1	2	1	2	2	19.33	1	1	1	1	1	1
2	1	1	1	1	2	3	2	2	19.14	1	1	1	1	1	1
2	1	2	1	2	1	1	2	2	20.03	1	1	1	2	1	1
2	1	2	1	1	2	3	2	2	24.97	1	1	2	1	1	1
2	1	2	1	2	1	1	2	2	20.03	1	1	1	2	1	1
2	1	2	1	2	2	3	2	2	20.96	1	1	1	2	1	1
2	1	2	1	1	2	3	2	2	26.67	3	1	1	1	1	1
2	1	2	1	2	2	3	2	2	20.96	1	1	1	2	1	1
2	1	2	1	2	2	1	2	2	23.05	1	1	1	1	1	1
2	1	2	1	2	2	1	2	2	23.05	1	1	1	1	1	1
2	1	1	1	2	2	3	2	2	22.04	1	1	1	1	1	1
2	1	2	3	2	2	3	2	2	19.14	1	2	1	2	1	1
2	1	2	1	2	2	2	2	2	22.1	1	1	2	2	1	1
2	1	2	1	1	2	3	2	2	18.36	2	1	2	1	1	1
2	1	1	1	2	1	1	2	2	23.92	1	1	1	1	1	1
2	1	2	1	1	2	3	2	2	24.34	1	1	1	1	1	1
2	1	2	1	1	2	3	2	2	19.81	1	1	1	1	1	1
2	1	2	1	1	2	3	2	2	31.65	3	1	1	2	1	1
2	1	2	1	1	2	3	2	2	19.81	1	1	1	1	1	1
2	1	2	1	1	2	3	2	2	31.65	3	1	1	2	1	1
2	1	2	1	1	2	3	2	2	20.2	1	1	1	2	1	1
2	1	1	1	1	2	1	2	2	20.7	1	1	1	2	1	1
2	1	2	1	2	2	2	2	2	34.37	3	1	2	2	1	1
2	1	2	1	2	1	2	2	2	24.61	1	1	1	1	1	1
2	1	1	1	1	2	3	2	2	19.14	1	1	1	1	1	1
2	1	2	1	1	2	3	2	2	18.36	2	1	2	1	1	1
2	1	2	1	1	2	1	2	2	22.27	1	1	2	1	1	1
2	1	2	1	2	2	1	2	2	21.87	1	1	1	1	1	1
2	1	2	1	1	2	3	2	2	20.7	1	1	1	1	1	1
2	1	2	1	1	2	1	2	2	20.45	1	1	1	2	1	1
2	1	2	1	1	2	3	2	2	23.44	1	1	1	2	1	1
2	1	2	1	1	2	3	2	2	20.08	1	1	1	1	1	1
2	1	2	1	1	2	1	3	2	19.53	1	1	2	2	1	1
2	1	2	2	2	2	3	2	2	20.78	1	1	1	1	1	1
2	1	2	1	1	2	1	2	2	26.3	3	1	1	1	1	1
2	1	2	1	1	2	3	2	2	20.08	1	1	1	1	1	1
2	1	1	2	2	2	3	2	2	20.78	1	1	1	1	1	1
2	1	2	1	1	2	3	2	2	23.44	1	1	1	2	1	1
2	1	2	2	1	2	1	2	2	27.97	3	1	1	2	1	1
2	1	2	1	1	2	2	2	2	22.03	1	1	2	1	1	1
2	1	2	1	1	2	1	2	2	23.37	1	1	2	1	1	1
2	1	2	2	1	2	1	2	2	29.41	3	1	1	1	1	2
2	1	2	2	1	2	1	2	2	25.48	3	1	1	1	1	1
2	1	1	1	1	2	3	2	2	26.71	3	1	1	2	1	2
2	1	2	2	1	2	3	2	2	25.76	3	2	2	1	1	1
2	1	1	1	1	2	1	2	2	27.34	3	1	2	1	1	1
2	1	2	1	1	2	3	2	2	19.94	1	1	2	1	1	1
2	1	2	1	2	1	2	2	2	28.44	3	1	1	1	1	1
2	1	2	2	1	2	3	2	2	25.76	3	2	2	1	1	1
2	1	2	2	2	1	2	2	2	22.41	1	1	2	2	1	1
2	1	2	1	1	2	3	2	2	19.94	1	1	2	1	1	1
2	1	2	1	2	1	2	2	2	28.44	3	1	1	1	1	1
2	1	2	2	2	2	2	3	2	24.03	1	1	1	1	1	1
2	1	1	1	1	2	3	2	2	26.71	3	1	1	2	1	2
2	1	2	1	1	1	1	2	2	25.32	3	1	1	2	1	1
2	1	2	2	1	2	1	2	2	25.48	3	1	1	1	1	1
2	1	2	3	2	1	2	2	2	20.28	1	1	1	2	1	1
2	1	2	3	2	1	2	2	2	20.28	1	1	1	2	1	1
2	1	2	2	1	2	1	2	2	29.41	3	1	1	1	1	2
2	1	1	1	1	2	1	2	2	27.34	3	1	2	1	1	1
2	2	2	1	2	1	3	2	2	22.04	1	2	2	1	1	1
2	2	1	1	1	2	2	2	2	31.12	3	2	2	2	1	1
2	2	2	2	1	2	1	2	2	23.66	1	2	2	2	1	1
2	2	1	2	1	2	3	3	2	25.59	3	2	2	2	1	1
2	2	2	1	1	2	1	2	2	30.64	3	2	1	2	1	2
2	2	2	2	1	2	1	2	2	21.31	1	1	1	2	1	1
2	2	2	2	2	2	1	2	2	29.04	3	2	2	1	1	1
2	2	1	2	1	2	1	2	2	23.39	1	2	2	2	1	1
2	2	2	3	2	2	2	2	2	31.56	3	2	2	1	1	1
2	2	2	2	1	2	3	2	2	29.98	3	2	2	1	1	2
2	2	2	2	1	2	1	2	2	36.44	3	2	2	1	1	2
2	2	2	2	1	2	1	2	2	19.66	1	2	2	2	1	1
2	2	2	3	2	1	1	2	2	28.41	3	2	2	1	1	1
2	2	1	1	1	2	2	2	2	21.88	1	2	2	2	1	1
2	2	2	2	1	2	2	3	2	28.7	3	2	2	2	1	1
2	2	2	1	1	2	1	2	2	30.74	3	2	2	1	1	1
2	2	2	2	2	2	2	2	2	26.57	3	2	2	2	1	1
2	2	2	3	2	2	2	2	2	31.56	3	2	2	1	1	1
2	2	2	2	1	2	3	2	2	29.98	3	2	2	1	1	2
2	2	2	2	1	2	1	2	2	36.44	3	2	2	1	1	2
2	2	2	2	1	2	1	2	2	19.66	1	2	2	2	1	1
2	2	2	2	1	2	1	2	2	21.31	1	1	1	2	1	1
2	2	2	3	2	1	1	2	2	28.41	3	2	2	1	1	1
2	2	2	1	1	2	3	2	2	26.06	3	2	2	2	1	1
2	2	2	1	2	2	1	3	2	28.95	3	2	2	2	1	2
2	2	2	1	1	2	1	2	2	27.4	3	1	2	2	1	1
2	2	2	1	1	1	1	2	2	33.02	3	2	2	2	1	2
2	2	2	1	1	2	1	2	2	23.72	1	2	2	1	1	1
2	2	2	2	2	2	3	2	2	24.22	1	2	2	2	1	1
2	2	2	1	1	2	1	2	2	25	1	1	2	2	1	1
2	2	2	1	1	2	3	2	2	29.41	3	1	2	1	1	1
2	2	1	1	1	1	2	2	2	27.28	3	2	2	1	1	1
2	2	2	1	1	1	3	2	2	18.78	1	2	2	1	1	1
2	2	2	1	1	2	1	2	2	31.65	3	2	2	1	1	2
2	2	2	3	2	2	2	2	2	27.41	3	1	2	1	1	1
2	2	2	1	1	2	2	2	2	30.19	3	2	2	2	1	1
2	2	2	1	1	2	3	1	2	25.26	3	2	2	2	1	1
2	2	2	1	1	1	2	2	2	27.68	3	1	1	1	1	1
2	2	2	1	2	1	3	2	2	32.65	3	2	2	1	1	1
2	2	2	1	1	2	1	2	2	23.74	1	1	2	2	1	1
2	2	2	1	1	2	1	2	2	27.76	3	2	2	2	1	1
2	2	1	1	1	2	2	2	2	21.88	1	2	2	2	1	1
2	2	2	1	1	2	2	2	2	25.06	3	1	2	1	1	1
2	2	2	1	2	2	1	2	2	30.12	3	1	1	1	1	1
2	2	2	1	2	2	3	2	2	28.41	3	2	2	1	1	1
2	2	2	1	2	2	3	1	2	24.57	1	2	2	2	1	1
2	2	2	1	1	2	1	2	2	27.46	3	2	2	1	1	1
2	2	2	1	2	2	3	2	2	36.9	3	1	1	1	1	1
2	2	2	1	2	2	3	2	2	28.41	3	2	2	1	1	1
2	2	1	1	2	1	1	2	2	18.29	2	2	1	2	1	1
2	2	2	1	2	2	3	1	2	24.57	1	2	2	2	1	1
2	2	2	1	2	2	2	2	2	31.96	3	2	2	1	1	1
2	2	1	1	1	2	1	2	2	24.54	1	2	2	1	1	1
2	2	2	1	1	2	1	2	2	24.22	1	2	2	1	1	1
2	2	2	2	2	2	1	2	2	28.09	3	2	2	1	1	1
2	2	1	1	1	2	1	2	2	21.22	1	1	1	1	1	1
2	2	2	1	1	2	2	2	2	25.35	3	1	2	1	1	1
2	2	2	1	2	2	3	2	2	26.83	3	1	1	1	1	1
2	2	2	1	1	2	2	2	2	23.94	1	1	2	1	1	1
2	2	2	1	1	2	1	2	2	25.1	3	2	2	2	1	1
2	2	2	2	1	2	1	2	2	20.24	1	1	2	1	1	1
2	2	2	1	1	2	1	2	2	25.1	3	2	2	2	1	1
2	2	2	1	1	2	2	2	2	22.04	1	1	2	2	1	1
2	2	2	1	1	1	2	2	2	24.69	1	2	2	2	1	1
2	2	2	1	2	2	3	2	2	20.8	1	2	2	2	1	1
2	2	2	2	2	1	2	2	2	31.65	3	2	2	2	1	1
2	2	2	2	2	2	2	2	2	23.15	1	2	2	2	1	1
2	2	2	1	1	2	2	2	2	26.42	3	2	2	1	1	1
2	2	1	1	1	2	3	2	2	33.31	3	2	2	2	1	1
2	2	2	1	2	2	1	2	2	30.72	3	2	2	2	1	1
2	2	2	1	1	2	2	2	2	24.06	1	2	2	2	1	1
2	2	2	1	1	2	1	1	2	27.4	3	2	2	1	1	2
2	2	2	1	1	1	1	2	2	33.02	3	2	2	2	1	2
2	2	2	1	1	2	1	2	2	30.64	3	2	1	2	1	2
2	2	2	1	1	2	1	2	2	30.74	3	2	2	1	1	1
2	2	2	1	2	2	1	2	2	29.04	3	2	2	1	1	1
2	2	2	1	1	2	1	2	2	26.12	3	2	2	2	1	1
2	2	2	1	2	2	3	2	2	34.89	3	2	2	1	1	1
2	2	2	1	1	2	3	3	2	24.62	1	2	2	1	1	1
2	2	2	1	2	2	1	2	2	26.04	3	2	2	1	1	1
2	2	2	1	2	2	1	2	2	30.72	3	2	2	2	1	1
2	2	2	1	2	2	2	2	2	31.96	3	2	2	1	1	1
2	2	1	1	1	2	1	2	2	23.39	1	2	2	2	1	1
2	2	2	1	1	2	3	3	2	24.62	1	2	2	1	1	1
2	2	2	1	1	2	3	2	2	28.4	3	1	2	2	1	1
2	2	1	1	1	1	3	2	2	29.32	3	1	2	1	1	2
2	2	2	1	2	2	1	2	2	24.8	1	2	2	1	1	1
2	2	2	1	2	1	3	3	2	30.67	3	2	2	1	1	1
2	2	1	1	2	1	1	2	2	24.93	1	2	2	2	1	1
2	2	2	1	2	2	1	3	2	28.95	3	2	2	2	1	2
2	2	2	1	2	2	1	2	2	25.16	3	2	2	2	1	1
2	2	2	1	1	2	1	2	2	27.76	3	2	2	2	1	1
2	2	1	1	1	2	2	1	2	0.1	2	2	2	1	1	1
2	2	2	1	1	2	1	2	2	25.25	3	1	1	2	1	1
2	2	2	1	1	2	2	2	2	29.05	3	1	2	1	1	1
2	2	2	1	2	2	1	2	2	30.12	3	1	1	1	1	1
2	2	2	1	1	1	2	2	2	27.76	3	1	2	1	1	1
2	2	1	1	2	1	2	2	2	30.47	3	1	1	1	1	1
2	2	2	1	2	2	1	2	2	27.1	3	2	2	1	1	1
2	2	2	1	1	2	1	2	2	30.74	3	2	2	2	1	1
2	2	2	1	2	2	3	2	2	26.42	3	2	2	2	1	1
2	2	2	1	2	2	2	2	2	25.25	3	2	2	2	1	1
2	2	1	2	1	2	1	2	2	23.46	1	2	1	1	1	1
2	2	2	1	2	1	3	2	2	22.49	1	1	2	1	1	1
2	2	2	1	1	2	1	2	2	19.92	1	1	2	1	1	1
2	2	2	1	2	2	3	2	2	24.91	1	2	1	1	1	1
2	2	1	1	1	2	1	2	2	21.55	1	2	2	2	1	1
2	2	1	1	2	1	1	2	2	23.94	1	2	1	1	1	1
2	2	1	1	1	1	3	1	2	21.31	1	1	1	1	1	1
2	2	2	1	1	2	3	2	2	33.91	3	2	2	1	1	2
2	2	2	2	1	2	1	2	2	24.44	1	2	2	1	1	1
2	2	2	2	1	2	1	2	2	21.8	1	2	2	1	1	1
2	2	2	1	1	2	1	2	2	25.26	3	2	2	1	1	2
2	2	2	1	1	2	1	2	2	19.1	1	2	2	1	1	2
2	2	2	1	1	2	1	2	2	25.26	3	2	2	1	1	1
2	2	1	1	1	2	1	2	2	26.64	3	1	1	1	1	1
2	2	2	1	1	2	3	2	2	26.85	3	1	2	1	1	2
2	2	2	1	2	1	2	2	2	27.25	3	2	2	1	1	1
2	2	2	1	1	2	1	2	2	26.23	3	1	2	1	1	1
2	2	2	1	1	2	1	2	2	27.1	3	2	2	1	1	1
2	2	2	1	1	2	1	2	2	22.49	1	2	2	1	1	2
2	2	2	1	1	2	3	2	2	20.76	1	2	2	1	1	1
2	2	2	1	1	2	1	2	2	27.46	3	2	2	1	1	2
2	2	2	1	1	2	1	2	2	22.41	1	2	2	1	1	1
2	2	2	1	2	2	1	3	2	26.79	3	2	2	1	1	1
2	2	2	1	1	2	1	2	2	24.22	1	2	2	1	1	1
2	2	1	1	1	2	2	2	2	25.06	3	2	2	1	1	1
2	2	2	2	1	2	3	2	2	24.49	1	2	2	1	1	1
2	2	2	2	1	2	2	2	2	23.36	1	2	2	1	1	1
2	2	2	1	1	2	1	2	2	33.56	3	2	1	1	1	1
2	2	2	1	1	2	1	2	2	29.41	3	2	1	1	1	1
2	2	2	1	1	2	2	2	2	22.84	1	2	2	1	1	1
2	2	2	1	1	2	1	2	2	25.86	3	1	1	1	1	1
2	2	2	1	1	2	1	2	2	21.51	1	2	2	1	1	1
2	2	2	1	1	2	3	2	2	23.39	1	2	2	1	1	1
2	2	1	2	1	2	3	2	2	24.02	1	1	2	1	1	1
2	2	2	1	1	2	3	2	2	24.06	1	1	2	2	1	1
2	2	1	1	1	2	1	2	2	39.18	3	2	1	1	1	1
2	2	2	2	1	1	1	2	2	25.26	3	2	2	2	1	1
2	2	1	1	1	2	3	2	2	23.51	1	1	2	2	1	1
2	2	1	1	1	2	3	2	2	24.02	1	1	2	1	1	1
2	2	2	1	1	2	3	2	2	33.91	3	2	2	1	1	2
2	2	2	2	1	2	1	2	2	24.44	1	2	2	1	1	1
2	2	2	1	1	2	1	2	2	25.26	3	2	2	1	1	2
2	2	2	1	1	2	1	2	2	27.36	3	1	2	1	1	2
2	2	2	1	1	2	3	2	2	26.85	3	1	2	1	1	2
2	2	2	1	1	2	1	2	2	22.49	1	2	2	1	1	2
2	2	2	1	1	2	3	2	2	20.76	1	2	2	1	1	1
2	2	2	1	1	2	1	2	2	27.46	3	2	2	1	1	2
2	2	2	1	2	2	1	3	2	26.79	3	2	2	1	1	1
2	2	2	1	1	2	1	2	2	24.57	1	2	2	1	1	1
2	2	1	1	1	2	2	2	2	25.06	3	2	2	1	1	1
2	2	2	1	1	2	2	2	2	23.36	1	2	2	1	1	1
2	2	2	1	1	2	1	2	2	33.56	3	2	1	1	1	1
2	2	2	1	1	2	1	2	2	25.86	3	1	1	1	1	1
2	2	2	1	1	1	3	2	2	25.71	3	2	1	1	1	1
2	2	2	1	1	2	2	2	2	21.72	1	2	2	2	1	1
2	2	1	1	2	1	2	2	2	29.41	3	2	2	2	1	1
2	2	2	1	1	2	1	2	2	24.77	1	1	1	1	1	1
2	2	2	2	1	2	1	2	2	29.01	3	2	2	1	1	1
2	2	2	1	1	1	1	2	2	26.73	3	1	2	1	1	1
2	2	1	1	1	2	1	2	2	27.43	3	2	2	1	1	2
2	2	2	1	1	2	1	2	2	26.99	3	2	2	1	1	1
2	2	1	2	1	2	1	2	2	26.3	3	2	2	1	1	1
2	2	2	1	1	2	1	3	2	25.69	3	2	2	1	1	2
2	2	2	1	1	2	1	2	2	28.04	3	2	2	1	1	1
2	2	2	2	1	2	1	2	2	26.37	3	2	2	1	1	1
2	2	2	1	1	2	1	2	2	21.26	1	2	2	1	1	1
2	2	1	3	1	2	1	2	2	26.45	3	2	2	1	1	1
2	2	1	1	2	1	1	2	2	29.39	3	2	2	1	1	1
2	2	2	1	1	2	1	2	2	25.39	3	2	2	1	1	2
2	2	2	1	1	2	1	2	2	24.73	1	1	2	1	1	1
2	2	2	1	2	1	1	2	2	27.76	3	2	2	2	1	1
2	2	2	1	1	2	1	3	2	25.76	3	1	1	2	1	1
2	2	1	1	2	1	2	2	2	24.22	1	1	1	1	1	1
2	2	2	1	1	2	1	2	2	28.04	3	2	2	1	1	1
2	2	1	1	2	2	1	2	2	24.09	1	1	1	1	1	1
2	2	1	1	1	2	2	2	2	22.91	1	2	2	1	1	1
2	2	1	1	2	2	2	2	2	25.35	3	2	1	1	1	1
2	2	2	1	1	2	1	3	2	25.95	3	2	2	1	1	1
2	2	1	2	2	1	1	2	2	26.12	3	2	2	1	1	1
2	2	2	2	1	2	3	2	2	24.57	1	1	1	1	1	1
2	2	2	1	1	2	2	2	2	24.69	1	1	1	2	1	1
2	2	2	1	1	2	3	2	2	24.57	1	1	1	1	1	1
2	2	2	1	2	2	1	2	2	28.09	3	2	1	1	1	1
2	2	2	1	1	2	1	2	2	25.51	3	2	2	1	1	1
2	2	2	1	1	2	1	2	2	21.8	1	2	2	1	1	1
2	2	2	1	2	2	1	2	2	25.26	3	2	2	1	1	1
2	2	2	1	1	2	1	2	2	35.49	3	2	2	1	1	1
3	1	2	1	1	2	3	2	2	21.5	1	1	2	2	1	1
3	1	2	1	1	1	1	2	2	23.15	1	1	1	1	1	1
3	2	2	1	2	1	2	2	2	28.73	3	2	1	2	1	1
3	2	1	3	1	2	1	2	2	24.8	1	2	2	1	1	1
3	2	2	2	1	1	1	2	2	20.08	1	2	2	1	1	1
3	2	2	1	1	2	2	2	2	24.82	1	2	1	2	1	1
3	2	1	1	1	2	1	2	2	26.12	3	2	2	1	1	1
3	2	2	1	1	2	1	2	2	21.45	1	1	2	1	1	1
3	2	2	1	1	2	1	2	2	25.01	3	2	2	1	1	1
1	2	2	2	1	2	2	1	2	24.72	1	1	1	1	2	2
1	2	1	3	1	1	2	2	2	24.15	1	1	1	2	2	1
1	2	1	1	2	1	3	1	2	24.49	1	1	1	1	2	1
1	2	2	1	1	2	1	2	2	24.91	1	2	2	1	2	2
2	1	1	1	2	2	2	3	2	25.78	3	1	2	2	2	2
2	1	2	2	2	2	2	2	2	24.46	1	1	1	2	2	1
2	1	2	1	1	2	1	2	2	20.81	1	1	2	2	2	1
2	1	2	2	1	2	3	2	2	24.34	1	1	1	1	2	1
2	1	2	1	1	2	1	3	2	22.86	1	1	1	2	2	1
2	1	2	2	1	2	3	2	2	22.83	1	1	1	2	2	1
2	1	1	1	2	2	2	2	2	25.39	3	1	1	2	2	1
2	1	1	1	2	2	2	3	2	34.25	3	2	2	2	2	1
2	1	2	2	2	1	3	2	2	33.32	3	1	1	1	2	1
2	1	2	1	1	2	3	2	2	22.83	1	1	1	2	2	1
2	1	2	1	2	2	1	2	2	20.31	1	1	1	2	2	1
2	1	2	1	2	2	2	2	2	24.46	1	1	1	2	2	1
2	1	2	2	2	2	2	2	2	22.21	1	2	2	2	2	1
2	1	2	1	2	2	1	2	2	26.17	3	1	1	2	2	1
2	1	2	1	2	2	1	2	2	25.71	3	1	1	1	2	1
2	1	2	1	2	1	2	2	2	21.83	1	1	1	2	2	1
2	1	2	1	1	2	3	2	2	23.51	1	1	2	2	2	1
2	1	2	1	1	2	1	2	2	20.81	1	1	2	2	2	1
2	1	2	1	1	2	3	2	2	25.71	3	1	1	1	2	1
2	1	1	1	2	1	1	2	2	22.04	1	1	2	1	2	1
2	1	1	1	2	2	2	3	2	34.25	3	2	2	2	2	1
2	1	1	1	2	2	1	2	2	0.25	2	1	2	2	2	1
2	1	2	3	2	2	3	2	2	22.15	1	1	2	2	2	1
2	1	1	3	2	1	2	2	2	20.7	1	1	1	2	2	1
2	1	1	1	2	2	1	2	2	24.8	1	1	1	1	2	1
2	1	2	1	2	2	1	3	2	23.44	1	1	2	2	2	1
2	1	1	1	2	2	1	2	2	24.8	1	1	1	1	2	1
2	1	2	1	2	2	1	3	2	23.44	1	1	2	2	2	1
2	1	2	3	2	2	3	2	2	22.15	1	1	2	2	2	1
2	1	2	1	2	2	1	2	2	27.55	3	1	2	1	2	1
2	1	2	1	2	2	1	2	2	20.31	1	1	1	2	2	1
2	1	1	1	2	1	1	2	2	22.04	1	1	2	1	2	1
2	1	2	1	1	2	3	2	2	23.51	1	1	2	2	2	1
2	1	2	1	1	2	1	2	2	24.14	1	1	1	1	2	1
2	1	2	1	2	1	2	2	2	23.44	1	1	1	2	2	1
2	1	2	1	1	2	1	2	2	24.14	1	1	1	1	2	1
2	1	2	1	2	2	1	2	2	22.86	1	1	1	2	2	1
2	1	2	1	2	1	3	2	2	33.32	3	1	1	1	2	1
2	1	2	1	2	2	1	2	2	26.17	3	1	1	2	2	1
2	1	1	1	2	2	2	2	2	25.39	3	1	1	2	2	1
2	1	2	1	1	2	1	2	2	24.56	1	1	1	1	2	1
2	1	2	1	2	2	1	2	2	25.24	3	1	1	2	2	1
2	1	2	1	2	2	2	2	2	22.21	1	2	2	2	2	1
2	1	2	1	1	2	1	2	2	20.57	1	1	1	1	2	1
2	1	2	1	1	2	1	2	2	20.57	1	1	1	1	2	1
2	1	2	1	1	2	1	2	2	24.56	1	1	1	1	2	1
2	1	2	1	1	2	1	3	2	19.53	1	1	2	2	2	1
2	1	2	1	1	2	1	2	2	20.45	1	1	1	2	2	1
2	1	2	3	1	1	2	3	2	23.95	1	1	2	1	2	2
2	1	2	1	1	1	1	3	2	25	1	1	2	2	2	1
2	1	2	1	1	2	3	2	2	23.12	1	1	1	1	2	1
2	1	2	1	1	1	1	2	2	21.56	1	1	1	2	2	2
2	1	2	1	1	2	1	2	2	19.26	1	1	1	2	2	1
2	1	2	2	2	1	2	2	2	22.41	1	1	2	2	2	1
2	1	2	1	2	1	1	2	2	18.36	2	1	1	2	2	1
2	1	2	1	2	1	2	2	2	25.91	3	1	1	2	2	1
2	1	2	2	1	2	1	2	2	24.98	1	1	1	1	2	2
2	1	2	1	1	2	1	2	2	19.26	1	1	1	2	2	1
2	1	2	1	2	1	1	2	2	18.36	2	1	1	2	2	1
2	1	2	2	1	2	1	2	2	24.98	1	1	1	1	2	2
2	1	2	1	1	1	1	2	2	21.56	1	1	1	2	2	2
2	1	2	1	1	1	1	3	2	25	1	1	2	2	2	1
2	1	1	1	1	2	3	2	2	23.12	1	1	1	1	2	1
2	1	2	1	2	2	1	2	2	37.72	3	1	1	2	2	1
2	1	2	1	1	2	1	2	2	21.87	1	1	1	1	2	1
2	1	2	1	2	2	1	2	2	29.75	3	1	2	1	2	1
2	1	2	1	1	2	3	2	2	23.88	1	1	2	1	2	1
2	1	2	1	1	1	1	2	2	25.32	3	1	1	2	2	1
2	2	2	1	2	2	1	2	2	25.69	3	1	1	2	2	1
2	2	2	2	2	1	1	2	2	25.06	3	2	1	2	2	1
2	2	2	1	1	2	1	2	2	22.86	1	2	1	2	2	1
2	2	2	1	2	2	1	3	2	21.37	1	2	2	2	2	1
2	2	2	1	2	2	3	2	2	25.35	3	2	2	1	2	1
2	2	1	2	1	2	1	2	2	27.4	3	1	2	2	2	1
2	2	2	2	1	2	1	2	2	22.6	1	1	2	2	2	1
2	2	1	1	1	2	3	2	2	27.68	3	2	2	2	2	1
2	2	2	2	1	2	3	2	2	27.77	3	1	2	2	2	1
2	2	2	2	1	2	2	2	2	31.65	3	1	1	2	2	2
2	2	2	2	1	2	1	1	2	32.87	3	2	2	2	2	2
2	2	2	2	2	2	2	2	2	25.25	3	2	2	2	2	2
2	2	1	2	2	1	2	2	2	21.22	1	1	1	1	2	1
2	2	2	2	1	2	1	2	2	35.49	3	1	2	2	2	1
2	2	2	2	1	2	2	2	2	25.06	3	2	2	2	2	2
2	2	2	1	2	2	1	3	2	21.37	1	2	2	2	2	1
2	2	2	1	1	2	2	1	2	26.47	3	2	1	2	2	2
2	2	2	3	1	2	2	2	2	19.38	1	2	2	1	2	1
2	2	2	2	2	1	1	2	2	25.06	3	2	1	2	2	1
2	2	2	1	1	2	1	2	2	22.86	1	2	1	2	2	1
2	2	1	2	2	2	3	2	2	29.56	3	2	2	2	2	1
2	2	2	2	1	2	2	2	2	31.65	3	1	1	2	2	2
2	2	2	2	1	2	2	2	2	25.06	3	2	2	2	2	2
2	2	2	2	1	2	1	1	2	32.87	3	2	2	2	2	2
2	2	1	2	2	2	3	2	2	29.56	3	2	2	2	2	1
2	2	2	2	1	2	1	2	2	22.72	1	2	2	2	2	1
2	2	2	1	1	2	1	2	2	22.6	1	1	2	2	2	1
2	2	2	1	1	2	1	2	2	30.1	3	2	2	1	2	1
2	2	2	2	1	2	3	2	2	25.01	3	2	2	2	2	1
2	2	2	1	1	2	2	2	2	22.86	1	2	2	1	2	1
2	2	2	1	1	2	3	2	2	37.98	3	2	2	2	2	1
2	2	2	3	1	2	2	2	2	23.31	1	1	2	2	2	1
2	2	2	1	1	1	2	2	2	24.54	1	2	2	2	2	1
2	2	2	2	2	1	1	2	2	41.91	3	1	1	1	2	2
2	2	2	2	2	1	2	2	2	32.56	3	2	2	1	2	2
2	2	1	3	2	1	3	2	2	27.18	3	2	2	1	2	1
2	2	1	2	1	2	1	2	2	32.82	3	2	2	1	2	1
2	2	2	2	1	2	3	2	2	25.25	3	1	2	2	2	1
2	2	2	2	2	2	1	2	2	23.38	1	2	2	1	2	1
2	2	1	1	1	2	2	3	2	28.09	3	1	2	1	2	2
2	2	2	1	1	1	2	2	2	25.95	3	1	1	2	2	1
2	2	2	1	2	2	1	2	2	25.69	3	1	1	2	2	1
2	2	1	1	1	2	2	2	2	31.12	3	2	2	2	2	1
2	2	1	1	1	1	3	2	2	21.97	1	2	2	2	2	1
2	2	2	1	1	2	1	2	2	25.95	3	1	2	1	2	1
2	2	2	1	2	2	2	2	2	31.35	3	1	2	2	2	1
2	2	1	1	2	1	2	2	2	19.38	1	1	1	1	2	1
2	2	2	1	2	2	2	2	2	25.47	3	2	2	1	2	1
2	2	2	1	2	2	1	1	2	31.92	3	2	2	1	2	1
2	2	1	1	1	2	1	2	2	19.72	1	1	1	1	2	1
2	2	1	1	1	2	3	2	2	35.92	3	2	2	2	2	1
2	2	2	1	2	2	2	2	2	26.73	3	1	2	2	2	1
2	2	2	1	2	1	2	2	2	25.88	3	2	2	1	2	1
2	2	1	1	2	1	3	2	2	29.39	3	2	2	1	2	1
2	2	1	1	2	2	2	2	2	23.74	1	2	2	1	2	1
2	2	2	1	1	2	1	2	2	35.49	3	1	2	2	2	1
2	2	1	1	1	2	1	3	2	30.42	3	2	2	1	2	1
2	2	1	1	1	2	1	2	2	27.43	3	1	2	2	2	1
2	2	2	2	2	1	3	2	2	21.3	1	2	2	2	2	1
2	2	1	1	1	2	1	2	2	27.43	3	1	2	2	2	1
2	2	2	2	2	1	3	2	2	24.06	1	2	2	1	2	1
2	2	2	1	1	2	1	2	2	27.74	3	2	2	1	2	1
2	2	1	1	1	2	2	2	2	26.54	3	2	2	2	2	1
2	2	2	3	2	2	1	2	2	23.51	1	2	1	2	2	1
2	2	2	1	2	1	3	3	2	28.4	3	2	2	2	2	1
2	2	1	1	1	2	3	2	2	32	3	1	2	1	2	1
2	2	2	1	1	2	1	2	2	22.72	1	2	2	1	2	1
2	2	1	1	2	2	2	3	2	22.09	1	2	2	2	2	1
2	2	2	1	1	2	1	2	2	30.1	3	2	2	1	2	1
2	2	2	1	2	2	1	2	2	28.73	3	2	2	1	2	1
2	2	2	1	1	2	1	2	2	25.25	3	1	1	2	2	1
2	2	2	1	2	1	1	2	2	24.49	1	1	2	2	2	1
2	2	1	1	2	1	1	2	2	24.93	1	2	2	2	2	1
2	2	2	1	1	2	2	2	2	29.96	3	2	2	2	2	1
2	2	1	1	2	2	2	2	2	23.74	1	2	2	1	2	1
2	2	2	1	1	1	2	2	2	24.8	1	2	2	1	2	1
2	2	2	1	1	2	1	2	2	30.19	3	1	1	2	2	1
2	2	1	1	2	1	2	2	2	21.87	1	1	2	1	2	1
2	2	2	1	2	1	2	2	2	25.88	3	2	2	1	2	1
2	2	2	1	2	2	1	2	2	26.54	3	2	2	2	2	1
2	2	2	1	2	2	3	2	2	21.06	1	2	2	1	2	1
2	2	2	1	1	2	1	2	2	30.74	3	2	2	2	2	1
2	2	2	1	2	2	3	2	2	22.49	1	2	2	1	2	1
2	2	1	1	2	1	2	2	2	21.87	1	1	2	1	2	1
2	2	2	1	2	2	2	2	2	23.15	1	1	2	2	2	1
2	2	2	1	2	1	2	2	2	27.17	3	2	2	2	2	1
2	2	2	1	2	2	3	2	2	32.03	3	2	2	1	2	1
2	2	2	1	1	2	1	2	2	22.72	1	2	2	2	2	1
2	2	1	1	1	2	1	2	2	19.72	1	1	1	1	2	1
2	2	2	1	2	2	2	3	2	23.18	1	2	2	2	2	1
2	2	2	1	2	2	2	3	2	23.18	1	2	2	2	2	1
2	2	1	1	1	1	1	2	2	26.15	3	2	2	2	2	1
2	2	2	1	2	2	2	2	2	24.49	1	1	1	1	2	1
2	2	2	1	1	1	2	3	2	24.77	1	2	2	1	2	1
2	2	1	1	1	1	2	2	2	27.44	3	1	1	2	2	1
2	2	2	1	1	1	2	2	2	30.37	3	2	2	1	2	1
2	2	2	1	1	2	3	2	2	22.86	1	2	2	1	2	1
2	2	2	1	1	2	3	2	2	25.01	3	2	2	2	2	1
2	2	2	1	2	2	2	2	2	33.21	3	2	1	2	2	1
2	2	2	1	1	1	1	2	2	24.73	1	2	2	2	2	1
2	2	2	1	2	1	1	2	2	26.73	3	1	1	2	2	2
2	2	1	1	1	2	2	2	2	29.39	3	2	2	1	2	1
2	2	2	1	1	2	3	2	2	22.99	1	1	1	1	2	1
2	2	1	1	1	2	2	2	2	27.55	3	2	2	1	2	1
2	2	2	2	2	2	3	2	2	27.16	3	2	2	1	2	1
2	2	2	1	1	2	2	2	2	25.59	3	1	2	1	2	2
2	2	2	2	1	2	1	2	2	25.61	3	1	2	1	2	1
2	2	2	1	1	2	3	2	2	29.36	3	1	2	1	2	1
2	2	2	2	1	2	2	2	2	26.37	3	2	2	1	2	2
2	2	2	1	1	2	3	2	2	26.85	3	2	2	1	2	1
2	2	1	1	1	2	2	2	2	24.8	1	1	2	1	2	1
2	2	2	2	1	2	1	2	2	26.53	3	2	2	1	2	2
2	2	2	1	1	2	2	2	2	27.76	3	2	2	1	2	1
2	2	2	1	2	2	1	2	2	31.07	3	2	2	1	2	1
2	2	2	2	1	2	1	2	2	27.68	3	1	2	1	2	2
2	2	2	2	2	1	2	3	2	30.04	3	2	2	2	2	1
2	2	2	1	2	2	3	2	2	22.84	1	1	1	2	2	1
2	2	2	1	1	1	1	2	2	24.73	1	2	2	2	2	1
2	2	2	2	1	2	1	2	2	21.55	1	2	2	2	2	1
2	2	1	1	1	2	1	2	2	26.42	3	2	1	2	2	1
2	2	2	2	2	1	2	3	2	30.04	3	2	2	2	2	1
2	2	2	1	1	2	1	2	2	22.49	1	1	2	2	2	1
2	2	2	2	1	1	1	2	2	25.26	3	2	2	2	2	1
2	2	2	2	1	2	3	2	2	25.69	3	2	2	1	2	1
2	2	2	2	1	2	1	2	2	32.1	3	2	2	1	2	2
2	2	2	1	1	2	1	2	2	24.82	1	2	2	1	2	1
2	2	1	1	1	2	2	2	2	29.39	3	2	2	1	2	1
2	2	2	1	2	2	3	2	2	27.16	3	2	2	1	2	1
2	2	2	1	1	2	2	2	2	25.59	3	1	2	1	2	2
2	2	2	2	1	2	1	2	2	25.61	3	1	2	1	2	1
2	2	1	1	1	2	2	2	2	24.8	1	1	2	1	2	1
2	2	2	2	1	2	1	2	2	26.53	3	2	2	1	2	2
2	2	2	1	1	2	2	2	2	27.76	3	2	2	1	2	1
2	2	2	1	1	1	2	2	2	21.97	1	1	2	2	2	1
2	2	1	1	1	1	2	2	2	22.65	1	2	2	1	2	1
2	2	1	1	2	1	2	2	2	24.62	1	1	1	1	2	1
2	2	1	1	2	1	1	2	2	23.94	1	2	1	1	2	1
2	2	1	1	2	1	2	2	2	25.31	3	2	2	1	2	1
2	2	2	1	2	1	2	2	2	29	3	2	2	1	2	1
2	2	2	1	2	1	1	2	2	26.73	3	1	1	2	2	2
2	2	2	1	2	2	1	2	2	28.09	3	2	1	1	2	1
2	2	1	1	2	1	2	2	2	26.2	3	2	2	1	2	1
2	2	2	1	2	2	1	2	2	22.49	1	1	2	1	2	1
2	2	2	1	1	2	3	2	2	36.23	3	2	2	1	2	1
2	2	1	1	1	2	1	2	2	31.65	3	2	2	1	2	1
2	2	2	1	1	2	1	2	2	24.09	1	2	2	1	2	1
2	2	2	2	1	2	1	2	2	23.1	1	2	2	1	2	2
2	2	2	1	2	1	1	2	2	26.03	3	2	2	1	2	2
2	2	1	1	2	2	1	2	2	24.09	1	1	1	1	2	1
2	2	2	1	1	2	1	2	2	22.84	1	1	2	1	2	2
2	2	2	2	2	1	2	3	2	22.92	1	2	2	2	2	1
2	2	2	2	1	1	3	2	2	25.47	3	2	2	2	2	1
2	2	2	2	1	1	1	3	2	23.72	1	1	2	2	2	1
2	2	2	1	1	1	2	2	2	23.15	1	2	2	2	2	1
2	2	2	1	2	1	2	2	2	24.01	1	1	2	2	2	1
2	2	2	1	1	2	1	1	2	27.74	3	2	2	2	2	1
2	2	2	1	1	2	1	2	2	25.47	3	2	2	2	2	2
2	2	2	2	1	1	2	2	2	22.86	1	2	2	1	2	2
2	2	2	2	1	2	1	1	2	27.74	3	2	2	2	2	1
2	2	2	1	1	2	1	2	2	25.47	3	2	2	2	2	2
2	2	2	2	1	1	2	2	2	22.86	1	2	2	1	2	2
2	2	2	2	1	2	3	2	2	26.64	3	1	2	1	2	1
2	2	2	1	1	1	1	2	2	21.22	1	1	2	1	2	2
2	2	2	2	2	2	1	2	2	24.51	1	2	2	2	2	1
2	2	2	2	1	2	1	2	2	23.1	1	2	2	1	2	2
2	2	1	1	2	1	3	2	2	30.49	3	1	1	1	2	1
2	2	2	1	2	1	1	2	2	33.14	3	2	2	1	2	2
2	2	2	1	2	1	2	2	2	24.61	1	2	2	2	2	1
2	2	2	1	2	2	3	2	2	34.72	3	2	2	1	2	1
2	2	2	2	2	1	2	2	2	26.67	3	2	2	1	2	1
2	2	2	1	1	2	1	2	2	27.68	3	1	2	1	2	1
2	2	2	1	1	2	1	1	2	25.4	3	1	2	1	2	1
2	2	1	1	2	2	1	2	2	33.14	3	2	2	2	2	1
2	2	2	1	1	1	3	2	2	22.49	1	2	2	1	2	1
2	2	1	1	1	2	1	2	2	25.42	3	2	2	1	2	1
2	2	1	1	2	1	2	2	2	25.39	3	2	2	2	2	1
3	1	2	2	1	2	3	2	2	21.5	1	1	2	2	2	1
3	1	2	1	1	1	1	1	2	23.95	1	2	2	1	2	1
3	2	2	1	1	2	3	2	2	20.72	1	2	2	2	2	1
3	2	2	1	1	1	2	2	2	24.17	1	2	2	2	2	1
3	2	1	1	1	1	3	2	2	23.6	1	2	2	1	2	1
3	2	1	1	1	1	2	3	2	27.76	3	2	1	2	2	1
3	2	1	1	1	1	1	2	2	24.22	1	1	2	2	2	1
3	2	1	3	1	1	1	2	2	23.41	1	2	2	2	2	1
3	2	2	1	1	2	2	2	2	28.07	3	1	2	1	2	1
1	1	2	1	1	2	1	3	3	23.38	1	1	1	1	1	1
1	1	2	2	1	2	1	3	3	23.38	1	1	1	1	1	1
1	1	2	1	2	1	2	2	3	25.22	3	1	1	1	1	1
1	1	2	1	1	2	1	2	3	22.21	1	1	2	1	1	1
1	1	1	1	1	2	1	2	3	23.34	1	1	1	1	1	1
1	1	2	2	1	2	1	2	3	22.1	1	1	2	2	1	1
1	2	2	1	1	1	1	2	3	25.26	3	1	2	2	1	1
1	2	2	2	1	2	2	2	3	24.68	1	2	2	2	1	1
1	2	2	1	1	1	3	2	3	26.23	3	2	2	2	1	1
1	2	2	1	1	2	3	2	3	25.88	3	2	2	2	1	1
1	2	2	1	2	2	1	2	3	22.99	1	2	2	2	1	1
2	1	2	3	1	2	1	2	3	27.43	3	1	2	2	1	1
2	1	1	1	1	2	1	2	3	21.63	1	1	1	1	1	1
2	1	2	1	2	2	1	2	3	24.03	1	1	1	1	1	1
2	1	2	1	1	2	1	2	3	21.48	1	1	1	2	1	1
2	1	2	1	1	2	3	2	3	25.1	3	1	1	2	1	1
2	1	2	2	1	2	3	2	3	22.43	1	1	1	1	1	1
2	1	2	1	1	2	3	2	3	24.61	1	1	2	2	1	1
2	1	2	1	1	2	1	2	3	21.48	1	1	1	2	1	1
2	1	2	2	1	2	3	2	3	20.81	1	1	1	2	1	1
2	1	2	2	1	2	1	2	3	20.13	1	1	2	2	1	1
2	1	2	2	1	2	3	2	3	19.53	1	1	1	2	1	1
2	1	1	1	2	2	2	2	3	22.68	1	1	1	2	1	1
2	1	2	1	1	1	3	2	3	27.24	3	1	1	1	1	1
2	1	2	1	1	2	1	2	3	20.57	1	1	1	1	1	1
2	1	2	2	1	2	1	2	3	23.44	1	1	1	1	1	1
2	1	2	2	1	2	3	2	3	20.7	1	1	1	1	1	1
2	1	2	2	2	1	1	2	3	21.36	1	1	1	2	1	1
2	1	2	2	1	1	1	2	3	28.3	3	1	1	2	1	1
2	1	2	2	1	2	2	2	3	22.06	1	1	1	2	1	1
2	1	2	1	1	2	1	2	3	24.03	1	1	1	1	1	1
2	1	1	2	1	2	1	2	3	19.65	1	1	1	1	1	1
2	1	1	2	1	1	1	2	3	23.34	1	1	1	2	1	1
2	1	2	2	1	2	1	2	3	19.84	1	1	1	2	1	1
2	1	2	2	1	2	2	2	3	21.56	1	1	2	1	1	1
2	1	2	2	1	2	3	2	3	26.56	3	1	1	2	1	1
2	1	2	1	1	2	1	2	3	25.39	3	1	1	2	1	1
2	1	2	1	2	1	2	2	3	34.11	3	1	1	2	1	1
2	1	1	1	2	1	2	2	3	23.24	1	1	1	1	1	1
2	1	2	1	2	2	1	2	3	24.98	1	1	1	1	1	1
2	1	2	1	1	2	1	2	3	21.87	1	1	1	1	1	1
2	1	2	2	2	2	1	2	3	24.92	1	1	1	2	1	1
2	1	2	2	1	1	1	2	3	31.62	3	1	1	2	1	1
2	1	2	2	1	2	1	2	3	20.83	1	1	1	1	1	1
2	1	2	1	2	1	1	2	3	23.67	1	1	1	2	1	1
2	1	2	2	1	1	3	2	3	20.96	1	1	2	2	1	1
2	1	2	2	2	1	2	2	3	22.1	1	1	1	1	1	1
2	1	2	2	1	2	1	2	3	22.21	1	1	2	1	1	1
2	1	2	1	2	2	1	2	3	26.12	3	1	1	2	1	1
2	1	2	1	1	2	1	2	3	20.57	1	1	1	1	1	1
2	1	1	1	1	2	1	2	3	22.58	1	1	1	1	1	1
2	1	2	2	2	2	2	2	3	22.83	1	1	2	1	1	1
2	1	2	1	2	1	2	2	3	30.49	3	2	2	1	1	1
2	1	2	1	1	2	1	2	3	21.87	1	1	1	1	1	1
2	1	2	1	1	1	1	2	3	20.83	1	1	2	1	1	1
2	1	2	3	2	1	1	2	3	28	3	1	1	2	1	1
2	1	2	1	1	2	1	2	3	20.83	1	1	1	1	1	1
2	1	2	1	2	1	1	2	3	23.67	1	1	1	2	1	1
2	1	2	2	1	1	3	2	3	20.96	1	1	2	2	1	1
2	1	2	2	2	1	2	2	3	22.1	1	1	1	1	1	1
2	1	1	1	2	1	2	2	3	25.22	3	1	1	1	1	1
2	1	2	1	2	2	2	2	3	27.34	3	1	1	2	1	1
2	1	2	2	1	2	3	2	3	20.7	1	1	1	1	1	1
2	1	1	2	2	2	1	3	3	21.09	1	2	2	2	1	1
2	1	2	1	1	2	3	2	3	22.86	1	1	1	2	1	1
2	1	2	2	2	1	1	2	3	21.36	1	1	1	2	1	1
2	1	2	1	1	1	1	2	3	28.3	3	1	1	2	1	1
2	1	2	1	1	1	3	2	3	23.42	1	1	1	2	1	1
2	1	2	1	1	2	1	2	3	24.03	1	1	1	1	1	1
2	1	2	1	1	2	1	2	3	19.65	1	1	1	1	1	1
2	1	2	1	2	2	1	2	3	26.12	3	1	1	2	1	1
2	1	2	1	1	1	3	2	3	21.37	1	1	1	1	1	1
2	1	2	2	1	2	1	2	3	21.48	1	1	1	2	1	1
2	1	2	1	1	2	3	3	3	22.1	1	1	2	2	1	1
2	1	2	1	1	1	3	2	3	24.8	1	1	1	1	1	1
2	1	2	1	2	2	1	2	3	30.86	3	1	2	1	1	1
2	1	2	1	1	2	1	2	3	20.31	1	1	1	1	1	1
2	1	2	1	1	2	1	2	3	23.03	1	1	2	2	1	1
2	1	2	1	1	2	1	2	3	26.67	3	1	1	2	1	1
2	1	1	1	1	2	1	2	3	23.44	1	1	1	1	1	1
2	1	2	1	1	2	1	2	3	21.63	1	1	1	1	1	1
2	1	2	1	2	2	1	2	3	24.03	1	1	1	1	1	1
2	1	2	2	2	1	1	2	3	23.71	1	1	1	1	1	1
2	1	2	1	1	2	1	2	3	23.62	1	1	1	1	1	1
2	1	2	1	1	2	1	3	3	21.48	1	1	1	1	1	1
2	1	1	1	2	1	1	2	3	24.22	1	1	1	1	1	1
2	1	1	1	1	2	3	3	3	28.26	3	1	2	1	1	2
2	1	2	1	2	1	1	2	3	23.42	1	1	1	2	1	1
2	1	2	1	1	2	3	2	3	26.62	3	1	1	1	1	1
2	1	2	1	1	2	3	2	3	23.24	1	1	1	2	1	1
2	1	2	1	1	2	3	3	3	23.67	1	1	2	2	1	1
2	1	2	1	1	1	3	2	3	26.99	3	1	1	1	1	2
2	1	2	2	1	1	3	2	3	23.61	1	1	2	2	1	1
2	1	2	2	1	1	3	2	3	18.75	1	1	1	1	1	1
2	1	2	1	1	2	3	2	3	20.76	1	1	2	2	1	1
2	1	2	1	1	1	3	2	3	26.99	3	1	1	1	1	2
2	1	2	1	1	1	3	2	3	23.61	1	1	2	2	1	1
2	1	2	1	1	2	3	2	3	20.76	1	1	2	2	1	1
2	1	2	2	1	2	3	2	3	23.24	1	1	1	2	1	1
2	1	2	1	1	2	1	2	3	21.64	1	1	1	2	1	1
2	1	2	1	1	1	3	2	3	23.42	1	1	1	2	1	1
2	1	2	1	1	1	3	2	3	27.24	3	1	1	1	1	1
2	1	2	1	1	2	1	2	3	22.03	1	1	1	2	1	1
2	1	2	1	1	2	1	2	3	20.4	1	1	1	1	1	1
2	1	2	2	1	1	3	2	3	20.03	1	1	2	2	1	2
2	1	1	1	1	2	3	2	3	21.08	1	1	1	1	1	1
2	1	1	1	2	2	1	3	3	26.04	3	1	2	1	1	1
2	1	1	1	1	2	1	3	3	20.83	1	1	1	2	1	1
2	1	2	1	1	2	1	3	3	22.83	1	1	2	1	1	1
2	1	1	2	1	1	3	2	3	19.56	1	1	2	2	1	1
2	1	2	1	1	2	1	2	3	22.03	1	1	1	2	1	1
2	1	2	1	2	1	1	2	3	23.92	1	2	1	2	1	1
2	1	1	1	1	1	1	2	3	20.81	1	1	1	2	1	1
2	1	1	1	2	2	1	3	3	26.04	3	1	2	1	1	1
2	1	2	1	1	2	1	2	3	29.76	3	1	1	1	1	1
2	1	1	1	2	1	1	3	3	32.05	3	1	1	1	1	1
2	1	2	2	1	2	3	2	3	23.11	1	1	1	1	1	1
2	1	2	1	1	2	3	2	3	19.11	1	1	2	1	1	1
2	1	2	1	2	1	1	2	3	30.86	3	1	1	2	1	1
2	1	2	1	1	1	3	3	3	22.48	1	1	2	1	1	1
2	1	2	1	1	1	3	2	3	23.23	1	1	2	1	1	1
2	1	2	2	1	1	3	2	3	20.03	1	1	2	2	1	2
2	1	2	1	1	2	1	2	3	22.66	1	1	2	2	1	1
2	1	2	2	1	2	3	2	3	22.22	1	1	2	1	1	1
2	1	1	1	1	2	1	2	3	23.34	1	1	1	1	1	1
2	1	2	2	1	2	2	2	3	28.4	3	1	1	2	1	1
2	1	2	2	1	2	3	2	3	23.11	1	1	1	1	1	1
2	1	2	1	2	1	1	2	3	30.86	3	1	1	2	1	1
2	1	2	1	1	1	3	2	3	23.23	1	1	2	1	1	1
2	1	2	1	1	1	2	2	3	25.1	3	1	2	2	1	1
2	1	2	1	1	2	3	2	3	19.11	1	1	2	1	1	1
2	1	2	2	1	2	1	2	3	23.44	1	1	1	2	1	1
2	1	1	1	1	2	3	3	3	27.73	3	1	2	2	1	1
2	1	2	1	1	2	3	2	3	21.51	1	1	1	1	1	1
2	1	2	2	2	1	1	2	3	22.77	1	1	1	1	1	1
2	1	2	1	2	1	2	2	3	24.34	1	1	1	1	1	1
2	1	2	1	1	1	1	3	3	17.44	2	1	1	2	1	1
2	1	2	2	2	1	1	2	3	23.15	1	1	1	1	1	1
2	1	1	1	2	2	2	2	3	17.58	2	1	1	1	1	1
2	1	2	1	1	1	1	2	3	24.22	1	1	2	1	1	1
2	1	2	1	1	2	1	3	3	25.86	3	1	1	1	1	1
2	1	2	1	2	1	2	2	3	27.55	3	1	1	2	1	1
2	1	2	2	1	1	1	2	3	20.7	1	2	2	1	1	1
2	1	2	1	2	2	2	2	3	33.87	3	1	1	1	1	1
2	1	2	2	2	1	2	2	3	28.04	3	1	1	2	1	1
2	1	2	2	1	1	1	2	3	24.34	1	1	1	2	1	1
2	1	2	1	1	2	3	2	3	24.97	1	1	2	1	1	1
2	1	2	1	1	2	3	2	3	23.11	1	1	1	1	1	1
2	1	2	1	2	1	1	2	3	30.49	3	1	1	2	1	1
2	1	2	1	2	2	1	2	3	19.33	1	1	2	1	1	2
2	1	1	1	1	1	1	2	3	25.91	3	1	1	1	1	1
2	1	1	1	2	1	3	3	3	22.86	1	1	1	1	1	1
2	1	2	2	2	1	2	2	3	28.04	3	1	1	2	1	1
2	1	2	1	2	1	1	2	3	30.49	3	1	1	2	1	1
2	1	2	1	2	2	1	2	3	19.33	1	1	2	1	1	2
2	1	2	1	1	1	1	2	3	25.91	3	1	1	1	1	1
2	1	2	1	2	2	2	2	3	33.87	3	1	1	1	1	1
2	1	1	1	2	1	3	3	3	22.86	1	1	1	1	1	1
2	1	2	1	1	2	1	3	3	25.86	3	1	1	1	1	1
2	1	2	1	1	1	1	2	3	30.44	3	1	1	1	1	1
2	1	2	1	1	1	3	2	3	26.67	3	1	2	1	1	2
2	2	2	1	1	2	1	2	3	21.89	1	1	1	2	1	2
2	2	2	1	1	2	1	2	3	23.51	1	1	2	1	1	1
2	2	2	1	1	2	1	2	3	31.21	3	2	2	2	1	1
2	2	2	1	1	2	1	2	3	28.52	3	1	2	1	1	2
2	2	2	1	1	2	1	2	3	19.47	1	2	2	1	1	1
2	2	1	1	2	2	2	2	3	28.36	3	2	1	1	1	1
2	2	2	1	2	1	1	2	3	26.3	3	2	2	1	1	1
2	2	2	1	1	2	1	2	3	26.53	3	2	2	1	1	1
2	2	1	1	2	1	2	2	3	28.98	3	2	1	1	1	1
2	2	2	2	1	2	3	2	3	23.12	1	2	2	1	1	1
2	2	2	2	1	2	1	2	3	23.89	1	2	2	1	1	1
2	2	2	1	1	2	2	2	3	27.17	3	2	2	1	1	1
2	2	2	1	2	1	2	2	3	27.68	3	1	1	1	1	1
2	2	2	1	1	2	3	2	3	25.59	3	2	1	2	1	1
2	2	2	1	2	2	1	3	3	25.26	3	2	2	2	1	1
2	2	2	1	1	2	3	2	3	24.49	1	1	2	2	1	1
2	2	1	1	1	1	3	3	3	27.17	3	2	2	2	1	1
2	2	2	1	1	2	1	2	3	23.2	1	1	2	2	1	1
2	2	2	2	1	2	1	2	3	24.8	1	2	2	2	1	1
2	2	2	2	1	2	1	2	3	25.9	3	2	2	2	1	1
2	2	2	1	1	2	3	2	3	24.15	1	2	2	1	1	1
2	2	2	1	1	2	1	2	3	24.09	1	1	2	1	1	1
2	2	2	1	1	2	1	2	3	29.39	3	2	2	2	1	1
2	2	2	1	1	1	1	2	3	21.97	1	2	2	2	1	1
2	2	2	2	1	2	1	3	3	26.23	3	2	1	2	1	1
2	2	1	1	1	2	3	2	3	25.95	3	1	2	1	1	1
2	2	2	1	1	2	1	2	3	24.73	1	2	2	2	1	2
2	2	2	2	1	2	1	2	3	24.62	1	1	2	2	1	1
2	2	2	1	2	1	1	2	3	27.1	3	2	2	2	1	1
2	2	2	2	1	2	3	3	3	20.91	1	2	2	2	1	2
2	2	2	1	1	2	3	2	3	22.41	1	2	2	2	1	1
2	2	2	2	1	2	1	2	3	24.76	1	2	2	1	1	1
2	2	2	1	1	1	3	2	3	29.07	3	2	2	1	1	2
2	2	1	1	2	2	1	2	3	20.96	1	2	1	2	1	1
2	2	1	1	2	2	1	2	3	27.1	3	1	2	1	1	1
2	2	2	1	1	1	1	2	3	22.32	1	2	2	2	1	1
2	2	2	3	2	1	1	2	3	30.86	3	2	2	2	1	1
2	2	2	2	1	2	3	2	3	25.61	3	2	2	1	1	1
2	2	2	1	1	2	1	2	3	24.76	1	2	2	1	1	1
2	2	2	1	2	1	1	2	3	24.09	1	1	1	2	1	1
2	2	2	1	1	1	1	2	3	21.97	1	2	2	2	1	1
2	2	1	1	2	2	1	2	3	27.1	3	1	2	1	1	1
2	2	2	1	1	1	1	2	3	25.26	3	1	2	2	1	1
2	2	1	3	2	1	1	2	3	30.86	3	2	2	2	1	1
2	2	2	2	2	2	3	2	3	28.07	3	2	2	2	1	1
2	2	2	1	1	2	3	2	3	25.61	3	2	2	1	1	1
2	2	2	1	2	1	3	2	3	33.66	3	2	2	1	1	2
2	2	2	1	1	2	1	2	3	21.89	1	1	1	2	1	2
2	2	2	1	1	2	1	2	3	29.39	3	2	2	2	1	1
2	2	2	1	1	1	3	2	3	24.49	1	2	2	1	1	2
2	2	1	1	2	2	1	2	3	20.96	1	2	1	2	1	1
2	2	2	1	2	1	2	2	3	25.88	3	2	2	2	1	1
2	2	2	2	1	1	1	3	3	22.86	1	2	2	2	1	2
2	2	2	1	2	2	1	3	3	25.26	3	2	2	2	1	1
2	2	1	1	1	2	3	2	3	25.95	3	1	2	1	1	1
2	2	2	1	1	2	1	2	3	24.73	1	2	2	2	1	2
2	2	2	1	1	2	1	2	3	24.62	1	1	2	2	1	1
2	2	2	1	2	1	1	2	3	27.1	3	2	2	2	1	1
2	2	2	1	1	2	2	3	3	24.49	1	1	2	2	1	2
2	2	1	1	1	2	1	2	3	31.21	3	2	2	2	1	1
2	2	1	1	2	2	2	2	3	28.36	3	2	1	1	1	1
2	2	2	1	1	1	1	2	3	27.68	3	1	2	1	1	1
2	2	2	2	1	2	3	2	3	29.68	3	2	2	2	1	1
2	2	2	1	2	1	1	2	3	21.97	1	2	2	2	1	1
2	2	2	1	1	2	3	2	3	25.18	3	2	2	2	1	1
2	2	2	1	1	2	2	2	3	23.05	1	2	2	1	1	1
2	2	2	1	1	1	1	2	3	22.55	1	1	2	1	1	1
2	2	1	1	2	1	1	2	3	24.22	1	1	1	1	1	1
2	2	2	1	1	2	3	2	3	20.9	1	2	2	2	1	1
2	2	2	2	1	2	2	2	3	28.37	3	2	2	1	1	1
2	2	2	1	2	2	1	2	3	23.99	1	1	1	1	1	1
2	2	2	1	1	2	1	1	3	20.48	1	2	2	1	1	1
2	2	2	1	1	2	3	2	3	29.06	3	2	1	1	1	1
2	2	1	1	2	1	2	2	3	23.88	1	2	2	1	1	1
2	2	2	2	2	2	1	3	3	27.44	3	1	2	2	1	1
2	2	2	1	1	2	2	2	3	25.01	3	1	1	2	1	1
2	2	2	1	2	1	2	2	3	27.47	3	2	2	2	1	1
2	2	1	1	2	2	1	2	3	25.65	3	2	1	1	1	1
2	2	2	1	1	2	1	2	3	22.57	1	2	2	1	1	1
2	2	2	2	1	2	3	2	3	23.39	1	2	2	2	1	1
2	2	2	2	1	2	2	3	3	22.02	1	2	1	1	1	1
2	2	2	1	2	2	1	2	3	26.23	3	1	2	2	1	2
2	2	2	1	1	2	1	2	3	25.61	3	2	2	1	1	2
2	2	2	1	1	1	1	2	3	24.22	1	2	2	1	1	1
2	2	1	1	1	1	3	2	3	25.31	3	2	1	1	1	1
2	2	2	1	1	1	1	2	3	26.7	3	1	1	1	1	2
2	2	2	2	1	2	1	2	3	26.49	3	2	1	2	1	1
2	2	2	1	1	1	1	2	3	27.1	3	2	1	1	1	1
2	2	2	1	1	2	1	2	3	25.61	3	2	2	1	1	2
2	2	2	1	1	1	3	2	3	22.77	1	2	2	2	1	1
2	2	2	1	1	1	1	2	3	27.68	3	1	2	1	1	1
2	2	2	1	1	2	1	2	3	22.49	1	2	2	2	1	1
2	2	2	1	1	2	1	2	3	24.09	1	1	2	1	1	1
2	2	2	1	2	2	2	2	3	28.41	3	1	2	2	1	1
2	2	1	1	2	1	1	2	3	23.55	1	2	2	2	1	1
2	2	2	1	1	1	1	2	3	27.1	3	2	1	1	1	1
2	2	2	3	1	2	1	3	3	28.73	3	2	2	2	1	2
2	2	1	1	1	1	1	2	3	24.22	1	2	1	1	1	1
2	2	1	1	1	2	1	1	3	26.83	3	1	2	1	1	2
2	2	2	1	1	1	1	3	3	20.28	1	2	2	2	1	1
2	2	2	1	1	2	1	2	3	26.81	3	1	2	2	1	1
2	2	1	1	1	2	1	2	3	25.95	3	1	1	2	1	1
2	2	2	1	1	1	3	2	3	27.78	3	2	2	1	1	1
2	2	2	2	1	2	1	2	3	32.04	3	2	2	2	1	1
2	2	1	1	1	2	1	2	3	25.25	3	1	2	1	1	1
2	2	1	1	1	1	1	3	3	30.13	3	2	2	1	1	2
2	2	2	1	1	1	3	2	3	27.78	3	2	2	1	1	1
2	2	2	2	1	2	1	3	3	24.03	1	1	2	2	1	1
2	2	2	2	1	2	1	2	3	32.04	3	2	2	2	1	1
2	2	1	1	1	2	1	2	3	25.25	3	1	2	1	1	1
2	2	1	1	1	1	1	3	3	30.13	3	2	2	1	1	2
2	2	2	1	2	2	1	2	3	22.99	1	2	2	2	1	1
2	2	2	2	1	2	1	2	3	29.41	3	2	2	2	1	1
2	2	2	2	1	1	1	2	3	28.72	3	2	1	1	1	1
2	2	1	1	1	2	1	1	3	26.83	3	1	2	1	1	2
2	2	2	1	1	1	1	2	3	23.26	1	1	1	1	1	1
2	2	1	1	2	1	1	2	3	26.51	3	2	2	2	1	1
2	2	1	1	2	1	1	2	3	29.41	3	2	2	2	1	1
2	2	2	2	1	1	3	2	3	25.06	3	1	2	1	1	1
2	2	2	1	2	2	1	2	3	28.06	3	2	1	2	1	1
2	2	2	2	2	1	2	2	3	27.75	3	1	1	1	1	1
2	2	2	1	2	1	1	2	3	28.07	3	2	2	1	1	1
2	2	2	2	1	2	1	2	3	32.74	3	2	1	1	1	2
2	2	2	1	2	1	3	2	3	29.07	3	2	2	1	1	1
2	2	2	2	1	2	1	2	3	23.66	1	1	1	2	1	1
2	2	2	2	1	2	1	2	3	26.3	3	2	2	2	1	1
2	2	2	1	1	2	2	2	3	24.34	1	2	2	2	1	1
2	2	2	1	1	2	3	2	3	27.38	3	1	2	1	1	2
2	2	1	2	1	1	3	1	3	26.37	3	2	2	2	1	1
2	2	1	1	1	1	1	2	3	30.42	3	1	1	1	1	2
2	2	2	2	1	1	1	3	3	23.51	1	2	2	2	1	1
2	2	2	1	1	2	1	2	3	21.46	1	1	1	2	1	1
2	2	2	1	1	1	3	2	3	24.22	1	1	1	2	1	1
2	2	1	1	1	1	1	2	3	30.42	3	1	1	1	1	2
2	2	2	2	1	2	2	1	3	18.59	1	2	2	2	1	1
2	2	2	1	1	2	2	2	3	24.34	1	2	2	2	1	1
2	2	1	1	1	1	3	2	3	24.22	1	1	1	2	1	1
2	2	2	1	1	2	1	2	3	23.66	1	1	1	2	1	1
2	2	2	2	1	2	1	2	3	24.17	1	2	2	2	1	1
2	2	1	1	1	2	2	2	3	28.41	3	2	2	1	1	1
2	2	2	1	1	1	1	2	3	26.57	3	2	2	2	1	1
2	2	2	1	1	2	1	2	3	26.22	3	2	2	2	1	1
2	2	1	1	1	2	1	2	3	26.23	3	2	1	1	1	1
2	2	2	2	1	2	1	2	3	26.26	3	1	2	1	1	2
2	2	1	1	2	1	1	2	3	28.73	3	2	2	1	1	1
2	2	2	1	1	1	1	2	3	27.76	3	1	1	1	1	1
2	2	2	1	1	1	1	2	3	22.49	1	2	2	1	1	1
2	2	2	1	1	2	1	2	3	22.02	1	2	2	1	1	1
2	2	2	1	1	1	1	2	3	27.4	3	2	2	2	1	1
2	2	2	2	1	1	1	3	3	22.86	1	2	2	2	1	2
2	2	2	1	1	1	3	2	3	24.49	1	2	2	1	1	2
2	2	2	1	2	1	3	2	3	33.66	3	2	2	1	1	2
2	2	2	2	1	2	3	3	3	20.91	1	2	2	2	1	2
2	2	2	1	1	1	3	2	3	29.07	3	2	2	1	1	2
2	2	2	3	1	1	3	2	3	19.88	1	1	1	2	1	1
2	2	1	1	1	1	1	2	3	18.82	1	1	1	2	1	1
3	1	1	1	1	2	2	2	3	23.44	1	1	1	2	1	1
3	1	2	1	2	2	3	2	3	20.32	1	1	1	2	1	1
3	1	2	1	1	2	3	3	3	21.48	1	1	2	2	1	1
3	1	2	1	1	2	3	3	3	21.48	1	1	2	2	1	1
3	1	1	1	1	2	2	2	3	23.44	1	1	1	2	1	1
3	1	2	1	2	2	3	2	3	20.32	1	1	1	2	1	1
3	1	1	2	1	1	1	2	3	20.2	1	1	1	2	1	1
3	1	2	1	1	2	1	2	3	26.14	3	1	2	1	1	1
3	1	2	1	1	1	1	3	3	23.14	1	1	2	1	1	1
3	1	1	1	1	2	1	2	3	25.39	3	1	2	1	1	1
3	1	2	2	1	2	3	2	3	22.66	1	1	2	1	1	2
3	1	1	1	1	2	3	2	3	21.77	1	1	1	1	1	1
3	1	2	1	1	2	3	2	3	21.1	1	1	1	1	1	1
3	1	2	2	1	2	1	2	3	25.39	3	1	1	1	1	1
3	1	2	2	1	2	3	2	3	24.97	1	1	2	2	1	1
3	1	2	1	1	2	1	2	3	21.19	1	1	1	2	1	1
3	1	2	1	1	2	1	2	3	24.84	1	1	2	2	1	1
3	1	2	2	2	1	1	2	3	19.81	1	1	1	1	1	1
3	1	2	1	1	2	3	2	3	22.64	1	1	2	1	1	1
3	1	1	1	2	2	3	2	3	19.53	1	1	2	2	1	1
3	1	2	2	2	1	1	2	3	19.33	1	1	2	2	1	1
3	1	2	1	1	2	1	3	3	24.97	1	1	2	2	1	1
3	1	2	1	1	1	3	2	3	21.48	1	1	1	2	1	1
3	1	2	2	1	2	1	2	3	26.04	3	1	1	2	1	1
3	1	2	1	2	1	2	3	3	26.35	3	1	1	1	1	1
3	1	2	1	1	2	3	2	3	29.38	3	1	1	1	1	1
3	1	2	2	1	2	3	2	3	22.31	1	1	1	1	1	1
3	1	2	2	2	2	2	2	3	28.23	3	1	1	2	1	1
3	1	2	2	1	2	1	2	3	29.05	3	1	1	1	1	1
3	1	2	1	2	1	1	2	3	23.44	1	1	1	1	1	1
3	1	2	1	1	2	1	2	3	24.46	1	1	2	1	1	1
3	1	2	2	1	2	3	2	3	22.66	1	1	2	2	1	1
3	1	2	1	1	2	1	2	3	23.44	1	1	2	2	1	1
3	1	2	1	1	1	1	2	3	22.04	1	1	1	2	1	1
3	1	2	1	1	2	1	2	3	20.55	1	1	1	2	1	1
3	1	1	1	2	2	2	2	3	32.03	3	1	1	1	1	1
3	1	2	2	1	2	2	2	3	20.93	1	1	2	1	1	1
3	1	2	2	2	2	1	2	3	25.63	3	1	1	2	1	1
3	1	2	2	1	1	1	2	3	22.48	1	1	2	2	1	1
3	1	2	1	1	2	3	2	3	24.91	1	1	2	2	1	1
3	1	1	2	1	2	2	2	3	26.67	3	1	1	2	1	1
3	1	1	1	1	1	1	2	3	24.84	1	1	2	2	1	1
3	1	1	3	1	2	1	2	3	21.1	1	1	1	1	1	1
3	1	1	1	1	1	1	2	3	21.63	1	2	2	1	1	1
3	1	2	1	2	1	1	2	3	24	1	1	1	2	1	1
3	1	1	2	2	2	1	3	3	28.04	3	1	1	1	1	1
3	1	2	2	2	2	3	2	3	28.04	3	1	1	2	1	1
3	1	1	1	2	1	1	2	3	31.55	3	1	1	1	1	1
3	1	2	2	2	1	3	2	3	24.01	1	1	1	2	1	1
3	1	2	1	1	2	3	2	3	23.63	1	1	2	2	1	1
3	1	2	1	1	2	3	2	3	23.44	1	1	1	2	1	1
3	1	2	1	1	1	1	2	3	22.03	1	1	1	1	1	1
3	1	2	1	1	1	3	2	3	22.1	1	1	2	2	1	1
3	1	2	1	1	2	3	2	3	22.31	1	1	1	2	1	1
3	1	2	2	1	2	1	3	3	22.83	1	1	1	2	1	1
3	1	2	1	1	2	2	2	3	25.53	3	1	2	1	1	1
3	1	1	1	1	2	2	2	3	23.38	1	1	2	1	1	1
3	1	2	1	1	1	3	2	3	20.89	1	1	1	1	1	1
3	1	2	1	1	2	1	2	3	21.26	1	1	1	2	1	1
3	1	2	1	2	1	3	3	3	22.04	1	1	2	2	1	1
3	1	2	1	1	2	3	2	3	20.96	1	1	2	2	1	1
3	1	2	1	1	1	1	2	3	21.48	1	1	1	2	1	1
3	1	2	2	1	2	1	2	3	27.01	3	1	1	2	1	2
3	1	2	2	1	2	1	2	3	18.82	1	1	1	1	1	1
3	1	2	1	1	1	3	2	3	20.55	1	1	2	2	1	2
3	1	2	3	1	2	3	2	3	16.59	2	1	1	1	1	1
3	1	2	1	2	1	1	2	3	32.05	3	1	1	2	1	1
3	1	2	2	1	1	1	2	3	20.96	1	1	2	1	1	1
3	1	2	2	1	1	1	2	3	24.77	1	1	2	2	1	1
3	1	2	1	2	2	2	2	3	22.27	1	1	1	1	1	1
3	1	2	2	1	2	1	2	3	25.59	3	1	1	1	1	1
3	1	2	1	1	1	3	2	3	21.5	1	1	1	2	1	1
3	1	1	1	1	2	1	2	3	26.74	3	1	1	2	1	2
3	1	2	1	2	1	2	2	3	24.22	1	1	1	2	1	1
3	1	2	1	1	2	3	2	3	20.55	1	1	1	2	1	1
3	1	2	1	2	2	1	2	3	26.08	3	1	1	1	1	2
3	1	2	1	1	2	1	2	3	22.89	1	1	2	1	1	1
3	1	1	1	1	1	3	2	3	28.04	3	1	2	1	1	1
3	1	1	2	2	2	2	2	3	25.82	3	1	1	2	1	1
3	1	2	1	2	1	1	2	3	32.47	3	1	1	1	1	1
3	1	2	2	1	2	3	2	3	24.17	1	1	2	2	1	2
3	1	2	1	1	1	1	2	3	23.59	1	1	1	2	1	1
3	1	2	2	1	2	1	2	3	22.49	1	1	1	1	1	1
3	1	2	1	2	1	1	2	3	24	1	1	1	2	1	1
3	1	2	1	1	2	3	2	3	25.91	3	1	1	2	1	1
3	1	2	3	1	2	3	2	3	16.59	2	1	1	1	1	1
3	1	2	1	2	1	1	2	3	32.05	3	1	1	2	1	1
3	1	2	2	1	1	1	2	3	24.77	1	1	2	2	1	1
3	1	2	1	1	1	3	2	3	25.64	3	1	1	1	1	1
3	1	2	1	2	2	1	2	3	26.08	3	1	1	1	1	2
3	1	2	1	1	2	1	2	3	22.89	1	1	2	1	1	1
3	1	1	1	1	1	3	2	3	28.04	3	1	2	1	1	1
3	1	1	2	2	2	2	2	3	25.82	3	1	1	2	1	1
3	1	2	1	1	2	1	2	3	26.14	3	1	2	1	1	1
3	1	2	1	1	2	1	2	3	25.39	3	1	2	1	1	1
3	1	2	2	2	2	2	2	3	28.23	3	1	1	2	1	1
3	1	1	1	2	1	1	2	3	29.02	3	1	1	2	1	1
3	1	2	1	2	1	1	2	3	19.05	1	1	1	1	1	1
3	1	2	1	1	1	3	2	3	19.98	1	1	1	2	1	1
3	1	1	2	1	1	1	3	3	27.24	3	1	2	1	1	1
3	1	2	2	1	2	3	2	3	20.03	1	1	2	1	1	1
3	1	2	2	1	2	3	2	3	22.66	1	1	2	2	1	1
3	1	2	1	1	2	1	2	3	23.44	1	1	2	2	1	1
3	1	2	2	2	1	1	2	3	29.3	3	1	1	2	1	1
3	1	1	1	1	2	1	2	3	25.39	3	1	2	2	1	1
3	1	1	1	1	1	3	2	3	25.39	3	1	1	1	1	1
3	1	2	1	1	2	3	2	3	24.91	1	1	2	2	1	1
3	1	2	2	1	2	2	2	3	26.67	3	1	1	2	1	1
3	1	1	1	1	1	1	2	3	24.84	1	1	2	2	1	1
3	1	1	3	1	2	1	2	3	21.1	1	1	1	1	1	1
3	1	2	1	1	2	1	2	3	21.26	1	1	1	2	1	1
3	1	2	1	2	1	3	3	3	22.04	1	1	2	2	1	1
3	1	2	2	1	2	3	2	3	20.96	1	1	2	2	1	1
3	1	2	1	1	1	1	2	3	21.48	1	1	1	2	1	1
3	1	2	2	1	2	1	2	3	27.01	3	1	1	2	1	2
3	1	2	1	1	2	1	2	3	18.82	1	1	1	1	1	1
3	1	2	1	1	1	3	2	3	20.55	1	1	2	2	1	2
3	1	1	1	1	2	1	2	3	20.31	1	1	1	2	1	1
3	1	2	2	1	2	3	2	3	24.17	1	1	2	2	1	2
3	1	2	2	1	1	1	2	3	23.59	1	1	1	2	1	1
3	1	2	1	1	2	1	2	3	23.56	1	1	1	2	1	1
3	1	1	1	1	2	3	2	3	21.77	1	1	1	1	1	1
3	1	2	1	1	2	1	2	3	25.39	3	1	1	1	1	1
3	1	1	1	1	2	1	3	3	23.62	1	2	2	2	1	1
3	1	2	2	1	2	3	2	3	21.37	1	1	1	2	1	1
3	1	2	2	1	2	3	2	3	24.97	1	1	2	2	1	1
3	1	2	1	1	1	3	2	3	21.48	1	1	1	2	1	1
3	1	1	1	1	2	1	2	3	24.02	1	1	1	2	1	1
3	1	2	1	1	2	3	2	3	26.56	3	1	2	1	1	1
3	1	2	1	2	1	3	2	3	24.01	1	1	1	2	1	1
3	1	2	1	1	1	3	2	3	20.2	1	1	2	2	1	1
3	1	1	1	1	1	1	2	3	24.22	1	1	2	1	1	1
3	1	2	1	1	1	1	2	3	22.58	1	1	1	2	1	1
3	1	2	1	1	2	1	2	3	26.35	3	1	2	2	1	1
3	1	2	1	2	1	1	2	3	30.84	3	1	2	1	1	1
3	1	2	2	2	1	1	2	3	24.97	1	1	1	1	1	1
3	1	2	1	1	1	3	2	3	19.91	1	1	1	1	1	1
3	1	2	1	1	2	1	2	3	19.72	1	1	1	2	1	1
3	1	1	1	1	2	1	2	3	28.12	3	1	2	1	1	1
3	1	2	3	2	2	1	2	3	25.46	3	1	1	1	1	2
3	1	2	1	1	2	3	2	3	24.65	1	1	1	2	1	1
3	1	2	1	1	2	3	3	3	21.08	1	1	2	2	1	1
3	1	2	2	1	2	3	2	3	20.2	1	1	1	2	1	1
3	1	2	1	1	2	3	2	3	18.59	1	1	1	2	1	1
3	1	2	1	1	1	1	2	3	23.74	1	1	1	2	1	1
3	1	2	1	2	2	3	2	3	28.04	3	1	1	1	1	1
3	1	1	2	1	2	1	2	3	21.78	1	1	1	1	1	1
3	1	1	1	1	2	1	2	3	21.09	1	1	2	1	1	1
3	1	1	2	1	1	3	2	3	20.43	1	1	2	2	1	1
3	1	2	2	1	2	1	2	3	22.86	1	1	2	2	1	1
3	1	2	1	1	2	1	2	3	18.37	2	1	2	2	1	1
3	1	2	2	2	1	1	2	3	25.95	3	2	2	2	1	2
3	1	1	1	1	2	3	2	3	24.46	1	1	1	1	1	1
3	1	2	1	2	1	2	2	3	22.66	1	1	1	1	1	1
3	1	2	2	1	1	1	3	3	25.1	3	1	2	2	1	1
3	1	2	2	1	2	1	2	3	19.33	1	1	2	2	1	1
3	1	2	1	1	2	2	2	3	23.88	1	1	2	1	1	1
3	1	2	1	1	1	1	2	3	31.55	3	1	1	1	1	1
3	1	2	1	1	1	1	2	3	22.84	1	1	1	2	1	2
3	1	1	2	1	1	1	2	3	24.03	1	1	1	2	1	1
3	1	2	1	1	2	2	2	3	26.17	3	1	1	1	1	1
3	1	2	2	1	2	1	2	3	28.52	3	1	1	2	1	1
3	1	2	2	1	1	2	2	3	30.47	3	1	1	2	1	1
3	1	2	2	1	2	1	2	3	21.91	1	1	1	1	1	1
3	1	2	2	1	2	1	2	3	22.86	1	1	1	2	1	1
3	1	2	1	1	1	1	2	3	22.35	1	1	1	2	1	1
3	1	2	1	1	2	1	2	3	30.12	3	1	1	1	1	1
3	1	2	1	1	2	1	2	3	21.05	1	1	1	2	1	1
3	1	2	1	1	1	1	2	3	31.55	3	1	1	1	1	1
3	1	2	1	1	1	1	2	3	22.84	1	1	1	2	1	2
3	1	2	1	1	1	1	2	3	24.03	1	1	1	2	1	1
3	1	2	1	1	1	1	2	3	22.35	1	1	1	2	1	1
3	1	2	1	1	2	1	2	3	30.12	3	1	1	1	1	1
3	1	2	1	1	2	1	2	3	21.05	1	1	1	2	1	1
3	1	2	1	1	1	1	3	3	25.1	3	1	2	2	1	1
3	1	2	1	1	2	1	2	3	19.33	1	1	2	2	1	1
3	1	1	1	2	1	2	3	3	27.82	3	1	2	2	1	1
3	1	2	1	1	1	3	2	3	23.88	1	1	2	2	1	1
3	1	2	1	1	2	3	3	3	23.53	1	1	1	1	1	1
3	1	2	2	1	1	3	2	3	20.43	1	1	2	2	1	1
3	1	2	2	1	2	1	2	3	22.86	1	1	2	2	1	1
3	1	2	1	1	1	1	3	3	26.37	3	1	2	2	1	1
3	1	2	1	1	1	3	3	3	27.85	3	1	1	1	1	1
3	1	2	1	1	1	1	2	3	19.47	1	1	1	1	1	1
3	1	2	1	1	1	1	2	3	23.24	1	1	1	1	1	1
3	1	2	1	1	1	1	2	3	24.84	1	1	1	2	1	1
3	1	2	1	1	1	1	2	3	24.03	1	1	1	1	1	1
3	1	2	1	2	1	1	2	3	31.18	3	2	2	1	1	2
3	1	2	1	1	2	1	2	3	22.66	1	1	2	1	1	1
3	1	2	1	1	2	1	2	3	20.58	1	1	1	2	1	1
3	2	1	2	1	2	1	2	3	23.83	1	2	2	1	1	1
3	2	2	1	2	2	3	3	3	25.4	3	2	2	1	1	1
3	2	2	1	1	2	1	2	3	23.46	1	2	2	1	1	1
3	2	2	1	2	1	1	2	3	28.41	3	2	2	1	1	1
3	2	2	1	1	2	3	2	3	22.34	1	1	2	2	1	1
3	2	2	1	1	2	2	2	3	21.72	1	2	1	1	1	1
3	2	2	1	2	1	3	2	3	28.4	3	2	2	1	1	1
3	2	2	1	1	2	1	2	3	20.68	1	2	2	2	1	1
3	2	1	1	1	1	1	2	3	27.34	3	2	2	2	1	1
3	2	2	1	1	2	2	2	3	21.72	1	2	1	1	1	1
3	2	2	1	1	2	3	2	3	22.34	1	1	2	2	1	1
3	2	2	1	1	2	2	2	3	25.99	3	2	2	2	1	2
3	2	2	1	1	1	1	2	3	26.61	3	1	2	1	1	1
3	2	2	1	1	1	1	2	3	26.64	3	2	2	1	1	1
3	2	2	1	1	2	1	2	3	26.26	3	2	2	1	1	1
3	2	2	1	1	1	1	2	3	27.73	3	1	2	1	1	1
3	2	2	1	1	1	3	2	3	21.85	1	1	1	1	1	1
3	2	2	1	2	1	1	2	3	32.28	3	2	2	1	1	1
3	2	2	2	1	2	1	2	3	25.62	3	2	2	1	1	1
3	2	2	1	1	1	2	2	3	24.22	1	2	2	1	1	1
3	2	2	1	1	2	1	2	3	22.45	1	2	2	1	1	1
3	2	2	1	2	1	2	2	3	22.49	1	2	2	1	1	1
3	2	1	1	1	2	3	2	3	27.04	3	2	2	1	1	1
3	2	1	2	2	1	1	2	3	27.77	3	1	2	1	1	1
3	2	2	1	1	2	1	2	3	27.08	3	1	1	1	1	2
3	2	1	1	1	2	1	2	3	24.22	1	1	2	1	1	1
3	2	1	1	1	2	1	2	3	24.96	1	2	2	2	1	1
3	2	2	2	1	2	1	2	3	29.41	3	2	2	2	1	1
3	2	2	1	1	1	1	2	3	23.26	1	1	1	2	1	1
3	2	2	1	1	1	2	2	3	26.35	3	2	2	2	1	2
3	2	1	1	1	2	3	2	3	27.4	3	1	2	2	1	2
3	2	2	2	1	2	1	2	3	27.28	3	2	2	2	1	2
3	2	2	1	1	1	1	2	3	25.06	3	1	2	2	1	1
3	2	2	1	1	2	1	2	3	20.78	1	1	2	1	1	2
3	2	2	1	1	2	1	2	3	24.73	1	1	2	2	1	2
3	2	1	1	1	1	3	1	3	19.16	1	2	2	1	1	1
3	2	2	2	1	2	2	2	3	23.53	1	2	2	2	1	1
3	2	2	1	2	1	2	2	3	24.91	1	2	2	1	1	1
3	2	2	1	1	1	1	2	3	25.61	3	2	2	2	1	1
3	2	2	2	1	2	3	3	3	32	3	2	2	2	1	2
3	2	1	2	1	1	3	2	3	29.26	3	2	2	2	1	2
3	2	2	1	1	1	1	3	3	26.73	3	2	2	2	1	1
3	2	2	1	1	2	1	2	3	24	1	1	2	1	1	1
3	2	1	2	1	2	1	2	3	31.51	3	2	1	2	1	1
3	2	1	2	1	2	1	2	3	27.44	3	2	1	2	1	1
3	2	2	1	1	1	3	2	3	26.51	3	1	1	2	1	2
3	2	1	1	1	1	1	2	3	27.44	3	1	2	1	1	2
3	2	2	2	1	2	1	2	3	27.68	3	2	2	1	1	2
3	2	1	1	1	2	3	2	3	23.67	1	2	2	2	1	1
3	2	2	2	2	2	1	3	3	26.99	3	1	2	2	1	1
3	2	2	1	1	2	1	2	3	24.49	1	1	2	1	1	2
3	2	2	2	1	2	1	2	3	24.91	1	2	2	1	1	1
3	2	2	1	2	1	1	2	3	33.41	3	2	2	2	1	2
3	2	1	1	1	1	1	2	3	22.04	1	2	2	2	1	1
3	2	2	1	1	1	1	2	3	27.04	3	1	2	2	1	1
3	2	2	1	1	2	1	2	3	30.67	3	1	2	2	1	2
3	2	2	1	1	1	1	2	3	28.73	3	2	2	2	1	1
3	2	2	1	2	1	2	2	3	28.4	3	2	2	2	1	1
3	2	2	1	1	2	3	2	3	23.88	1	1	2	1	1	1
3	2	2	2	1	2	3	2	3	24.8	1	1	2	2	1	1
3	2	2	1	1	1	1	2	3	30.08	3	2	2	2	1	1
3	2	2	2	2	1	1	2	3	25.91	3	2	2	2	1	1
3	2	2	1	2	1	1	2	3	21.13	1	2	2	2	1	1
3	2	2	1	2	1	3	2	3	26.3	3	2	2	1	1	1
3	2	2	1	1	2	1	2	3	24.09	1	1	2	2	1	2
3	2	2	1	2	1	1	2	3	29.41	3	1	1	1	1	1
3	2	2	1	2	1	1	2	3	23.66	1	2	2	2	1	1
3	2	2	1	1	1	1	2	3	20.76	1	1	2	1	1	1
3	2	2	1	1	2	1	2	3	25.1	3	1	2	1	1	1
3	2	2	1	1	1	3	2	3	29.73	3	2	2	2	1	1
3	2	2	2	1	2	1	2	3	21.45	1	2	2	2	1	1
3	2	2	2	1	2	1	2	3	24.8	1	2	2	2	1	1
3	2	2	2	2	1	1	2	3	27.44	3	2	2	2	1	2
3	2	2	2	1	2	3	2	3	25.88	3	2	2	2	1	2
3	2	2	1	1	1	3	2	3	26.51	3	1	1	2	1	2
3	2	2	1	1	1	3	2	3	31.05	3	2	2	1	1	1
[truncated: 1,041 more rows]
